1 **Title:** Persistent trajectory-modulated hippocampal neurons support memory-guided navigation

2 **Authors**

3 Kinsky, Nathaniel R.<sup>1,3\*</sup>

4 Mau, William<sup>1</sup>

5 Sullivan, David W.<sup>1</sup>

6 Levy, Samuel J.<sup>1,2</sup>

7 Ruesch, Evan A.<sup>1</sup>

8 Hasselmo, Michael E.<sup>1</sup>

9

10 <sup>1</sup>Center for Systems Neuroscience, Boston University, 610 Commonwealth Ave., Boston, MA  
11 02215, USA.

12 <sup>2</sup>Graduate Program for Neuroscience

13 <sup>3</sup>Lead contact: [kinsky@bu.edu](mailto:kinsky@bu.edu)

14

15 **ABSTRACT**

16 Trajectory-dependent splitter neurons in the hippocampus encode information about a  
17 rodent's prior trajectory during performance of a continuous alternation task. As such, they  
18 provide valuable information for supporting memory-guided behavior. Here, we employed  
19 single-photon calcium imaging in freely moving mice to investigate the emergence and fate of  
20 trajectory-dependent activity through learning and mastery of a continuous spatial alternation  
21 task. We found that the quality of trajectory-dependent information in hippocampal neurons  
22 correlated with task performance. We thus hypothesized that, due to their utility, splitter neurons  
23 would exhibit heightened stability. We found that splitter neurons were more likely to remain  
24 active and retained more consistent spatial information across multiple days than did place cells.  
25 Furthermore, we found that both splitter neurons and place cells emerged rapidly and maintained  
26 stable trajectory-dependent/spatial activity thereafter. Our results suggest that neurons with  
27 useful functional coding properties exhibit heightened stability to support memory guided  
28 behavior.

29

## 30 INTRODUCTION

31 Place cells in the hippocampus encode the current position of many different animals and  
32 humans (Ekstrom et al., 2003; Geva-Sagiv, Romani, Las, & Ulanovsky, 2016; Miller et al., 2013;  
33 Muller & Kubie, 1987; Muller, Kubie, & Ranck, 1987; Niediek & Bain, 2014; O'Keefe, 1976;  
34 O'Keefe & Dostrovsky, 1971) supporting the known role of the hippocampus in spatial memory  
35 and navigation across species (Morris, Garrud, Rawlins, & O'Keefe, 1982; Vorhees & Williams,  
36 2014). However, the hippocampus is also widely known for its role in supporting the encoding,  
37 retrieval, and consolidation of non-spatial long-term memories (Corkin, 1984; Eichenbaum,  
38 2004; Milner, Corkin, & Teuber, 1968), suggesting that it must represent variables beyond an  
39 animal's current location. Indeed, recent studies have demonstrated that the hippocampus  
40 encodes the dimensions of a given task, from odors (Muzzio et al., 2009; Wood, Dudchenko, &  
41 Eichenbaum, 1999) to time (Howard et al., 2014; Kraus, Robinson II, White, Eichenbaum, &  
42 Hasselmo, 2013; MacDonald, Lepage, Eden, & Eichenbaum, 2011; Manns, Howard, &  
43 Eichenbaum, 2007; Pastalkova, Itskov, Amarasingham, & Buzsáki, 2008; Robinson et al., 2017;  
44 Salz et al., 2016) to tones (Aronov, Nevers, & Tank, 2017). One early demonstration that the  
45 hippocampus encodes dimensions beyond an animal's current location was the discovery of  
46 trajectory-dependent neurons or splitter neurons (Frank, Brown, & Wilson, 2000; Wood,  
47 Dudchenko, Robitsek, & Eichenbaum, 2000), cells whose firing rate within a particular position  
48 was modulated based on the animal's past or future trajectory in a spatial alternation task. The  
49 generation of this neural correlate suggests a potential mechanism allowing the hippocampal  
50 code to support both memory and decision based planning.

51 Several studies have demonstrated place cell firing fields move, or remap, their locations  
52 in response to new learning during a spatial learning task (Dupret, O'Neill, Pleydell-Bouverie, &

53 Csicsvari, 2010; McKenzie, Robinson, Herrera, Churchill, & Eichenbaum, 2013). These studies  
54 highlight that the flexible adjustment of place field locations is important for learning new  
55 information. Conversely, the ability of hippocampal neurons to maintain the same firing location  
56 in the absence of learning might support long-term memory retrieval. In support of this idea, a  
57 recent study illustrated that neurons with place fields located near a hidden goal were more stable  
58 over time than cells with fields in other locations (Zaremba et al., 2017). Two other experiments  
59 found that increasing rodents' attention to a task selectively heightened stability in neurons that  
60 encoded task-relevant features (Kentros, Agnihotri, Streater, Hawkins, & Kandel, 2004; Muzzio  
61 et al., 2009). These studies, along with the finding that place cells with fields in close proximity  
62 to a goal location exhibit heightened activity in post-learning sleep (Dupret et al., 2010), suggest  
63 that the utility of a neuron's information to task performance influences its long-term stability.

64 Thus, since splitter neurons provide immediately relevant information for performing a  
65 spatial alternation task, we hypothesized that these neurons are important for successful task  
66 performance. Furthermore, we hypothesized that due to their utility, splitters may exhibit  
67 different long-term dynamics when compared to place cells. Specifically, we addressed three  
68 lines of inquiry. First, does the level of trajectory-dependent information within the hippocampus  
69 correlate with behavioral performance? Second, given the steady evolution of hippocampal  
70 activity patterns across days (Cai et al., 2016; Mau et al., 2018; Rubin, Geva, Sheintuch, & Ziv,  
71 2015; Ziv et al., 2013), do splitter neurons remain part of the active population longer than other  
72 cells, thus providing a longer lasting memory or planning signal to guide behavior? Third, once a  
73 neuron establishes trajectory-dependent activity, is it less prone to remapping than other  
74 neurons? These questions are particularly relevant since trajectory-dependent activity has been  
75 observed in other tasks (Ferbinteanu & Shapiro, 2003; Smith & Mizumori, 2006b) and could be

76 employed more generally by the hippocampus to guide the appropriate behavior based on  
77 environmental cues (Smith & Mizumori, 2006a).

78         To track neurons across long timescales, we paired a continuous spatial alternation task  
79 with *in vivo* miniscope recordings of GCaMP6f activity in dorsal CA1 of freely-moving mice.  
80 This technology allowed us to not only track the long-term activity of neurons, but also to  
81 adequately characterize the heterogeneity of trajectory-dependent activity in the hippocampus,  
82 since we can simultaneously record from a large number of neurons in each session. We first  
83 found that trajectory-dependent coding correlates with task performance, suggesting it is  
84 important for supporting memory-guided behavior. Second, we established that a neuron's  
85 functional coding properties, also referred to as functional phenotype below, are important for  
86 predicting its long-term activity: splitter neurons were more likely to be persistently active in the  
87 days following their onset than were return arm place cells indicating that neurons which provide  
88 more adaptive information might provide longer lasting input to downstream structures. Third,  
89 we found that trajectory-dependent neurons display more consistent long-term information about  
90 an animal's location than pure place cells. Fourth, we found that the population as a whole  
91 displayed a rapid onset of trajectory-dependent activity followed by stable coding of trajectory  
92 thereafter. Last, we discovered that recruitment of context-dependent splitter cells peaked several  
93 days into training, whereas place cell recruitment peaked on the first day. These results combined  
94 suggest that neurons which develop the most behaviorally important coding properties are  
95 preferentially stabilized in both their short and long-term dynamics, which enables them to more  
96 consistently and effectively support memory-guided behavior. Our research paves the way for  
97 future studies investigating how heterogeneity in the neural code might support acquisition and  
98 retention of more complex behavioral tasks.

99

## 100 **RESULTS**

### 101 *Behavior and Imaging*

102       Food deprived mice (n=4) with neurons expressing GCaMP6f in region CA1 of the  
103 dorsal hippocampus were trained to perform a continuous spatial alternation task on a figure-8  
104 maze (Figure 1A) while we simultaneously recorded calcium activity using a miniaturized  
105 microscope. Mice exhibited a range of learning rates, taking from 5 to 21 sessions to acquire the  
106 task, which was defined as the third consecutive session of performance at or above our criteria  
107 of 70% (Figure 1B). Mice performed continuous alternation at or greater than criteria on average  
108 throughout the course of the experiment (Figure 1C). We utilized custom-written software  
109 (Kinsky, Sullivan, Mau, Hasselmo, & Eichenbaum, 2018; Mau et al., 2018) to extract neuron  
110 ROIs (Figure 1D), construct their corresponding calcium traces, and identify each ROI's putative  
111 spiking activity (Figure 1E). Using this technique, we recorded from large numbers of neurons  
112 (243-1205 neurons per ~30 minute-session) and successfully tracked them across days by  
113 comparing the distance between neuron ROI centroids (Figure S1A) and verifying that ROIs did  
114 not change orientation of their major elliptical axis between sessions (Figure S1B).

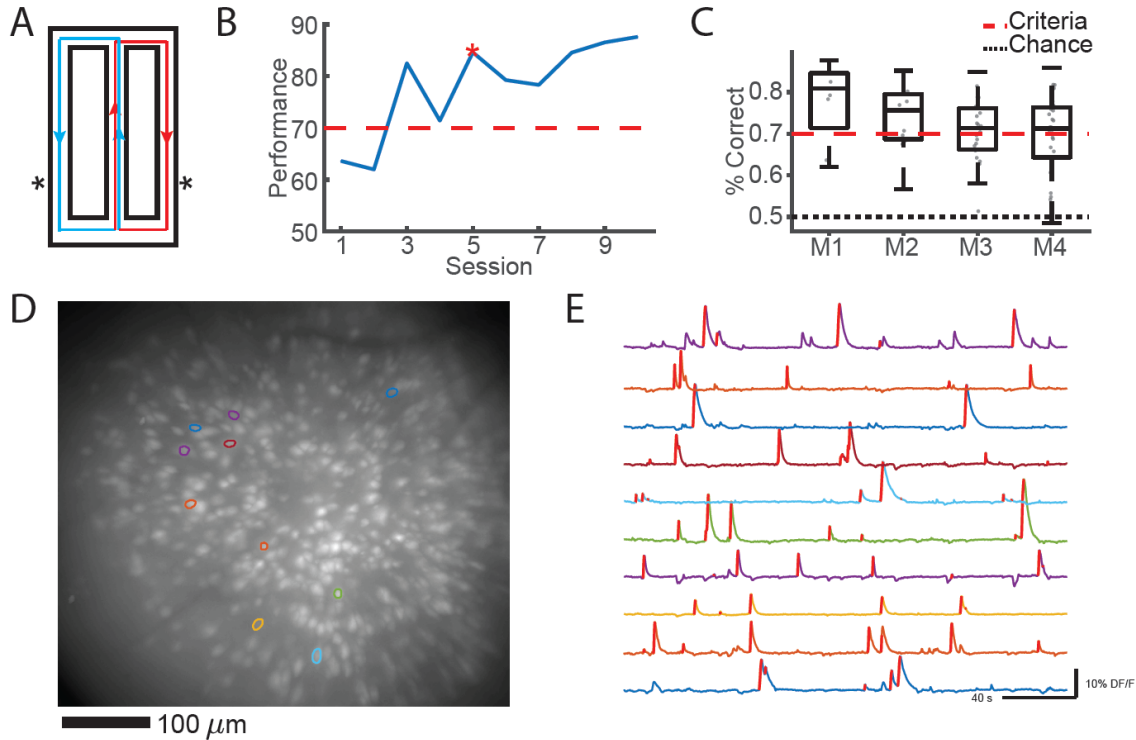

115

116 **Figure 1: Experimental Setup and Imaging**

- 117 A) Alternation Maze. Blue = Left turn trajectories, Red = Right turn trajectories, \*= location of food  
118 reward.  
119 B) Example learning curve for one mouse. Red dashed = acquisition criterion (70%), red asterisk =  
120 task acquisition day.  
121 C) Performance summary for all four mice, all sessions included. Red dashed = criterion, black  
122 dashed = chance.  
123 D) Example maximum projection from one imaging session with 10 neuron ROIs overlaid.  
124 E) Example calcium traces for ROIs depicted in D. Red lines on the ascending phase of each  
125 calcium event indicate inferred spiking activity.  
126

### 127 *Trajectory-Dependent Activity is Maintained Across Days*

128 The initial studies establishing the existence of trajectory-dependent splitter cells in the  
129 hippocampus were performed using electrophysiology in rats (Frank et al., 2000; Wood et al.,  
130 2000). Thus, we first wondered if we could detect trajectory-dependent activity in a different  
131 species while using a technique with much lower temporal resolution. To do so, we constructed  
132 tuning curves representing the probability a given neuron had calcium activity at each spatial bin

133 (1cm) along the stem in correct trials only, and classified neurons as trajectory-dependent  
134 splitters if at least 3 bins displayed a significant difference between their tuning curves ( $p < 0.05$ ,  
135 permutation test). We found that we were capable of not only identifying trajectory-dependent  
136 cells on a given day ( $60 \pm 23$ , mean  $\pm$  s.e.m. across all four mice), but that in many cases these  
137 neurons maintained the same functional phenotype across multiple days (Figure 2A-B).  
138 Significant trajectory-dependent activity was exhibited by 10% of neurons active on the maze  
139 stem across all sessions (12%, 5%, 12%, and 9% for individual mice); note that this method for  
140 identifying trajectory-dependent activity is more conservative than that used in previous studies  
141 (Frank et al., 2000; Ito, Zhang, Witter, Moser, & Moser, 2015; Wood et al., 2000). Apparent  
142 trajectory-dependent activity could also potentially result from factors such as systematic  
143 variations in the mouse's lateral position along the stem. We addressed this in two ways. First,  
144 we limited the portion of the maze we considered the stem to exclude any areas where the mouse  
145 exhibited stereotypical turning behavior by eye (Figure 2A-B, bottom). Second, we performed an  
146 ANOVA for each splitter neuron which included the animal's upcoming trajectory, position  
147 along the stem, speed, and lateral position along the stem as covariates (Wood et al., 2000). We  
148 found that a high proportion of our splitter neurons were significantly modulated by upcoming  
149 turn direction after accounting for speed and lateral stem position (89%, 72%, 76%, and 83% for  
150 individual mice). Together, these results indicate that trajectory-dependent coding exists in  
151 mouse CA1 and in many cases maintains the same activity profile across both short and long  
152 timescales. To the best of our knowledge, this is the first demonstration of hippocampal  
153 trajectory-dependent activity using calcium imaging in mice.

154         Additionally, we observed the mean location of spatial firing along the stem progressed  
155 backward during the task such that calcium activity occurred at earlier and earlier portions of the

156 stem with time (Figure S2A). This is consistent with a study reporting the backwards-migration  
 157 of spatial firing with experience (Mehta, Quirk, & Wilson, 2000). Interestingly, we did not find  
 158 any evidence of consistent migration of spatial firing locations between sessions (Figure S2B).

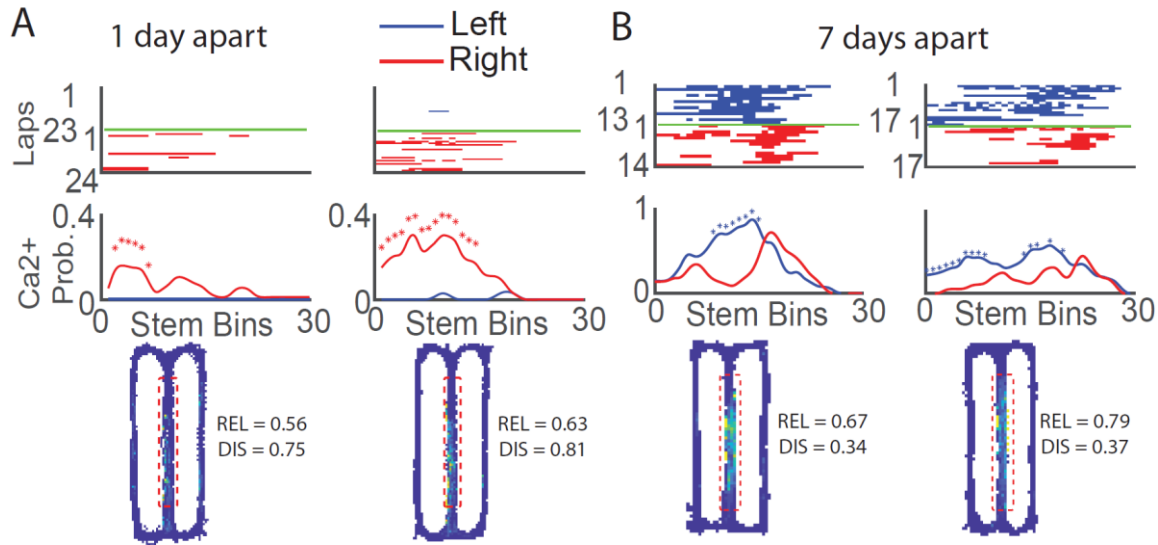

159

160 **Figure 2: Trajectory-Dependent Activity Persists Across Days**

161 A) *Top*: Calcium event rasters along the stem for correct trials for two sessions recorded one day  
 162 apart, sorted by turn direction at the end of the stem. Blue = left, Red = right. *Middle*: Calcium  
 163 event probability curves for each turn direction. \* $p < 0.05$ , shuffle-test. *Bottom*: occupancy  
 164 normalized calcium event map with reliability (REL) and discriminability (DIS) scores shown.  
 165 Red dashed = extent of stem considered in above plots.  
 166 B) Same as A, but for a different mouse and for sessions 7 days apart.

167 ***Trajectory-Dependent Activity Correlates with Performance***

168 Trajectory-dependent neurons provide information vital to task performance that might  
 169 be utilized by downstream structures to inform proper motor actions (Albouy et al., 2008; Kahn  
 170 et al., 2017; Wise & Murray, 1999). This idea is supported by a study which found that  
 171 trajectory-dependent activity markedly diminished during error trials (Ferbinteanu & Shapiro,  
 172 2003). Thus, we predicted that successful task performance would be associated with prominent  
 173 trajectory-dependent information in the neural code of neurons active on the stem. We utilized



174 two metrics to measure different attributes of trajectory-dependent activity: 1) reliability, which  
175 measured the consistency of a cell to fire on its preferred trial type along the entire stem, and 2)  
176 discriminability, which measured the magnitude of difference between left and right turn tuning  
177 curves along the entire stem (Methods). While most splitter neurons generally had high  
178 reliability and discriminability values, neurons with sparser calcium activity for one turn  
179 direction could exhibit low reliability and high discriminability (Figure 2A). Conversely, splitter  
180 neurons that reliably increased their event rate for one turn direction but still exhibited activity  
181 for the other turn direction could have high reliability but low discriminability (Figure 2B).

182 We obtained significant correlations between each metric and the animal's performance  
183 in a given session (Figure 3A, B top) suggesting that trajectory-information carried in  
184 hippocampal neurons might support working memory. To bolster this argument, we also trained  
185 a decoder to classify future turn direction using a linear discriminant analysis (LDA) at each  
186 spatial bin along the stem based on the neural activity of the population. We found that the  
187 accuracy of the LDA decoder positively correlated with the animal's performance on a given  
188 day, which indicated that better separation between upcoming left and right trajectories by the  
189 neural code was related to increased memory (Figure 3C, top). These results held for  
190 discriminability and LDA accuracy, but not reliability, when we averaged performance across  
191 mice (Figure 3A-C, bottom). Last, for each cell, we correlated the left turn and right turn tuning  
192 curves and subtracted those values from 1 ( $1 - \rho$ ) as another metric for trajectory-dependent  
193 information. This metric is very conservative because it produces low values (indicating high-  
194 trajectory dependent information) for splitter neurons that shift their location along the stem  
195 between trial types but not for splitter neurons that modulate event rates in the same location.  
196 Despite this we found a significant relationship between performance and  $1 - \rho$  when averaging

197 within mice (Figure 3D, bottom). We obtained similar results when we focused on local metrics  
 198 of trajectory-dependent activity rather than their average along the entire stem (Figure S3).  
 199 Together, these results indicate that trajectory-dependent information might facilitate accurate  
 200 task performance.

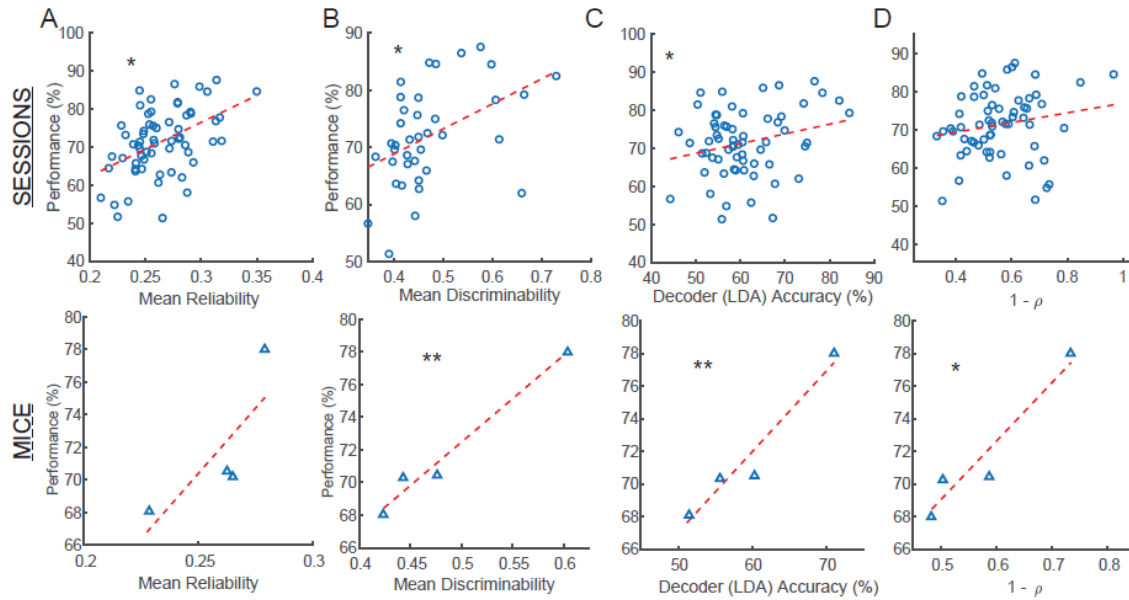

201

202

203 **Figure 3: The Quality of Trajectory-Dependent Activity Correlates with Performance**

- 204 A) *Top*: Performance for each session versus the mean reliability value for all cells from that session.  
 205 Circles = all sessions, all mice. \* $\rho=0.47$ ,  $p=1.2 \times 10^{-4}$  Pearson correlation. *Bottom*: Same as *Top* but  
 206 for each mouse, triangles = average for each mouse.  
 207 B) Same as A, but for the mean discriminability value. \* $\rho=-0.45$ ,  $p=0.0043$ , \*\* $\rho=-0.98$ ,  $p=0.012$   
 208 (bottom), Pearson correlation.  
 209 C) Same as A, but for the mean LDA decoder accuracy. \* $\rho=0.25$ ,  $p=0.047$ , \*\* $\rho=0.94$ ,  $p=0.003$   
 210 Pearson correlation.  
 211 D) Same as A, but for the mean value of  $1 - \text{Spearman's } \rho$  between left and right tuning curves.  
 212 \* $\rho=0.91$ ,  $p=0.046$ .

213 ***Trajectory-Dependent Neurons are more likely to Remain Active over Long Timescales than***  
214 ***Arm Place Cells***

215 Multiple studies (Cai et al., 2016; Kinsky et al., 2018; Mau et al., 2018; Rubin et al.,  
216 2015; Ziv et al., 2013) have shown that hippocampal neurons exhibit significant turnover across  
217 days with fewer staying active within the same environment as time progresses. However, these  
218 studies all treated the CA1 population as one homogeneous group. Thus, we wondered if splitter  
219 neurons, which exhibit highly task relevant information, would be preferentially stabilized within  
220 the CA1 network when compared to traditional place cells. As such the hippocampus would  
221 maintain a more consistent population of neurons which could be utilized for guiding this  
222 behavior. To address this question, we calculated the probability that each pool of neurons  
223 remained active in subsequent sessions. We found that splitter cells were more likely to remain  
224 active in a later session than arm place cells for both short (Figure 4A) and long (Figure 4B) time  
225 lags between sessions. This heightened likelihood that splitter neurons remained active persisted  
226 up to 15 days later when considering all mice together (Figure 4C-D) and also held when we  
227 compared splitters to place cells with activity on the stem (stem place cells, Figure 4E-F). To  
228 mitigate any sampling biases due to the higher event rate of splitter neurons (Figure S4A), we  
229 performed an additional analysis where we included only the most active place cells such that  
230 their mean event rate matched that of splitters. We obtained similar results when comparing  
231 splitter neurons to arm place cells but not stem place cells (Figure S4B-F). Since many stem  
232 place cells exhibited trajectory-dependent activity that fell short of meeting our splitter neuron  
233 criteria, this suggests that a neuron's activity level, along with its functional phenotype, also  
234 influences whether it stays active on following days. These findings combined support the idea  
235 that the strength of task relevant information carried by a neuron influences its likelihood to

236 maintain activity at later time points, which could be exploited for successful memory-guided  
 237 behavior across days.

238

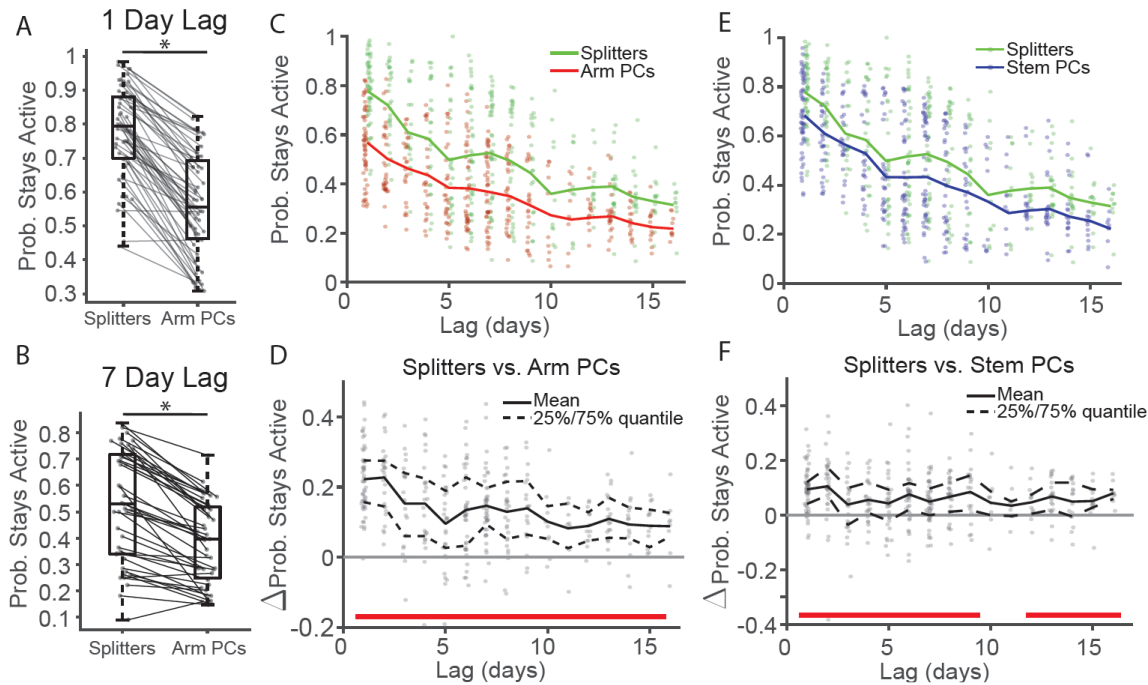

239

240 **Figure 4: Splitter Neurons are more likely to Remain Active between Sessions than Arm Place Cells**

- 241 A) Probability splitters and arm place cells (PCs) stay active day later for all mouse.  $*p=6.4 \times 10^{-11}$ ,  
 242 one-sided signed-rank test.  
 243 B) Same as B but for all mice and for sessions 7 days apart.  $*p = 1.1 \times 10^{-10}$ , one-sided signed-rank  
 244 test.  
 245 C) Probability splitters and arm place cells stay active versus lag between sessions. Dots:  
 246 probabilities from individual session-pairs, lines: mean probability at each time lag. Green =  
 247 splitters, Red = arm PCs.  
 248 D) Difference between the probability that splitters stay active versus the probability that arm PCs  
 249 stay active between sessions. Dots: probability differences for individual session-pairs. Black  
 250 solid/dashed lines: Mean and 25%/75% quantiles of data at each time point. Red bars =  
 251 significant differences after Holm-Bonferroni correction of one-sided signed-rank test. See Table  
 252 1 for signed-rank test p-values at all lags,  $\alpha = 0.05$ .  
 253 E) and F) Same as C-D for splitter neurons vs. stem PCs.  
 254

255 **Table 1: One-sided Signed-Rank Significance Values for Probability Splitter vs. Place Cells (PCs)**

256 **Remain Active between Sessions. PCs subsampled to match mean event rate of splitter neurons.**

| <b>Lag (days)</b>   | <b>1</b>  | <b>2</b>  | <b>3</b>  | <b>4</b>  | <b>5</b>  | <b>6</b>  | <b>7</b>  |
|---------------------|-----------|-----------|-----------|-----------|-----------|-----------|-----------|
| <b>vs. Arm PCs</b>  | 1.3e-10   | 9.1e-7    | 9.4e-5    | 4.3e-5    | 2.2e-4    | 4.5e-7    | 2.7e-8    |
| <b>vs. Stem PCs</b> | 2.e-9     | 5.3e-6    | 0.016     | 1.5e-3    | 0.017     | 5.4e-6    | 1.7e-4    |
| <b>Lag (days)</b>   | <b>8</b>  | <b>9</b>  | <b>10</b> | <b>11</b> | <b>12</b> | <b>13</b> | <b>14</b> |
| <b>vs. Arm PCs</b>  | 1.2e-5    | 1.0e-4    | 4.9e-3    | 0.014     | 1.2e-4    | 2.5e-5    | 8.9e-4    |
| <b>vs. Stem PCs</b> | 1.1e-4    | 1.7e-3    | 0.082     | 0.097     | 5.2e-3    | 3.3e-4    | 0.012     |
| <b>Lag (days)</b>   | <b>15</b> | <b>16</b> |           |           |           |           |           |
| <b>vs. Arm PCs</b>  | 1.2e-4    | 9.8e-3    |           |           |           |           |           |
| <b>vs. Stem PCs</b> | 6.7e-3    | 2.0e-3    |           |           |           |           |           |

257

258           We next wondered how the information provided by splitter cells differs from that of  
259 other neuron functional phenotypes. To investigate, we decided to compare the long-term spatial  
260 coding properties of trajectory-dependent splitter neurons on the stem to return arm place cells  
261 (Figure 5A). When examining spatial calcium activity over the entire map across sessions, we  
262 found that splitter neurons had a significantly higher 2D event map correlation values than arm  
263 place cells (Figure 5B) and that this effect persisted up to 15 days later (Figure 5C) indicating  
264 that they were more stable overall. We observed similar results when we compared splitter  
265 neurons to stem place cells (Table 2, Figure S5). This indicates that, in addition to staying active  
266 over longer time-scales, trajectory-dependent splitter neurons might also better guide memory  
267 task performance by providing a more consistent representation of space than place cells.

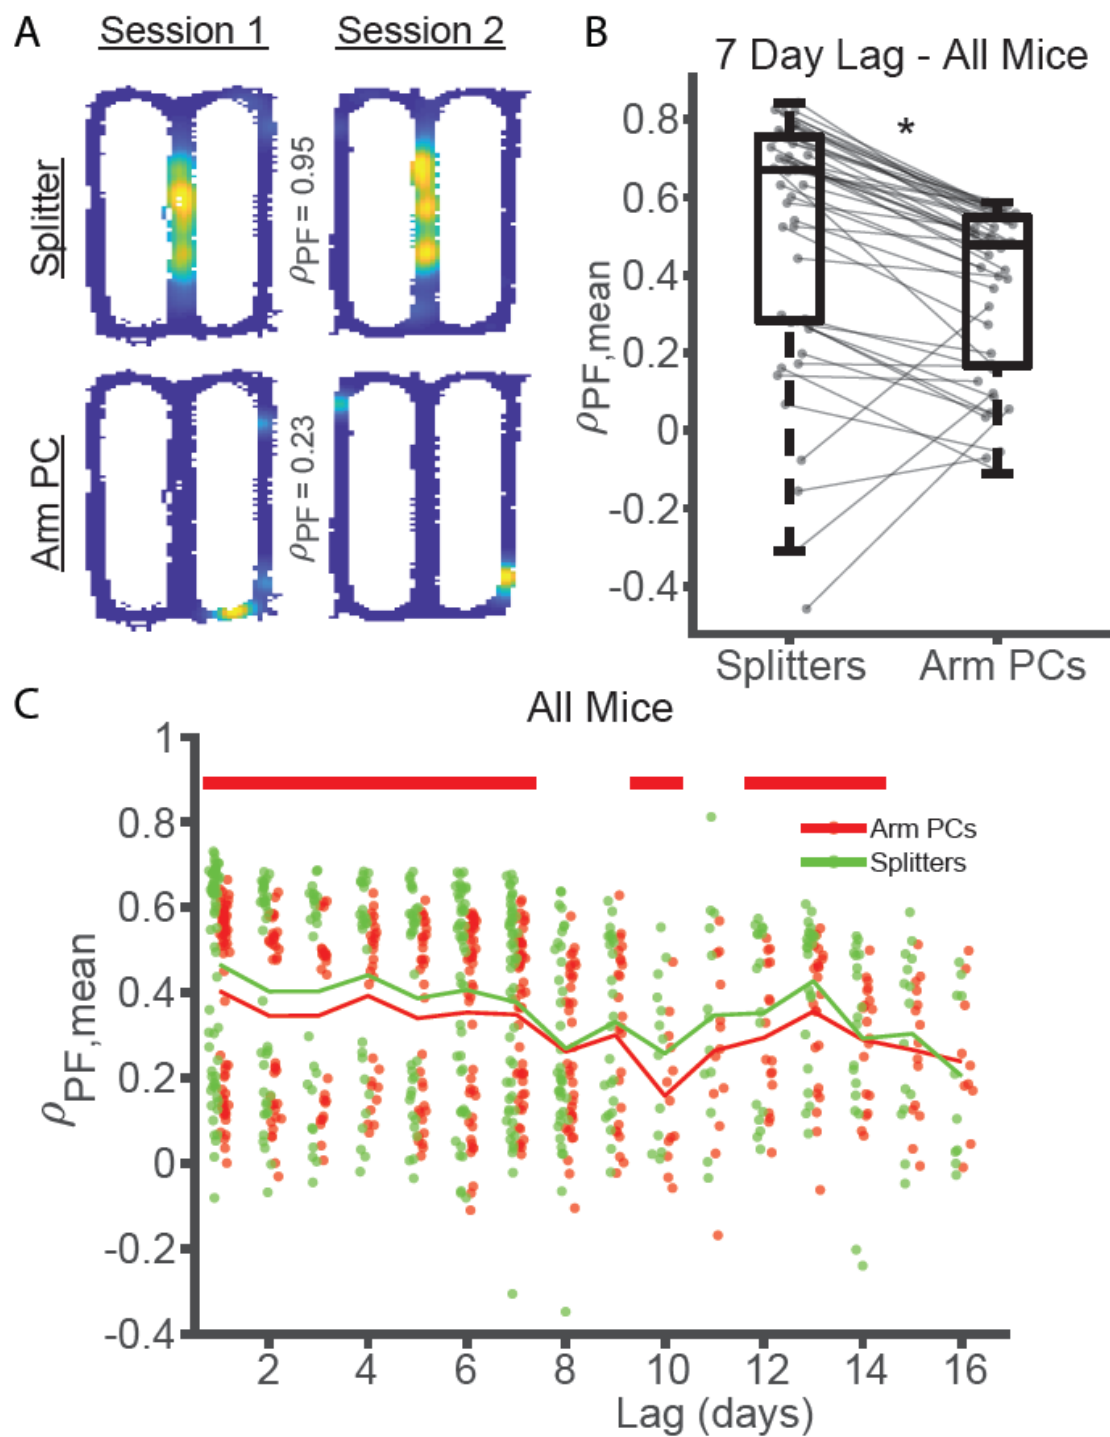

268

269 **Figure 5: Splitters Maintain More Consistent Spatial Information than Place Cells**

270 A) Example 2D occupancy normalized calcium event maps from the same splitter neuron (top) and arm  
 271 place cell (bottom) between sessions on adjacent days. The higher Spearman correlation between  
 272 splitter neuron event maps indicates more consistent spatial activity.

- 273 B) Mean spatial correlations for splitter neurons versus return arm PCs for all sessions seven days apart  
 274 from all. \* $p=4.5 \times 10^{-6}$ , one-sided signed-rank test.  
 275 C) Mean spatial correlations for splitter neurons and arm PCs versus lag between sessions for all  
 276 mice/sessions. Red = Arm PCs, green = splitters. Red bars = significant differences after Holm-  
 277 Bonferroni correction of one-sided signed-rank test,  $\alpha = 0.05$ . See Table 2 for raw p-values at all lags.

278 **Table 2: One-sided Signed-Rank Significance Values for Mean Spatial Correlation Values of Splitter vs. Arm PCs or**  
 279 **Splitters vs. Stem PCs.**

|                     |           |           |           |           |           |           |           |
|---------------------|-----------|-----------|-----------|-----------|-----------|-----------|-----------|
| <b>Lag (days)</b>   | <b>1</b>  | <b>2</b>  | <b>3</b>  | <b>4</b>  | <b>5</b>  | <b>6</b>  | <b>7</b>  |
| <b>vs. Arm PCs</b>  | 8.6e-8    | 5.0e-4    | 1.7e-3    | 4.6e-3    | 4.5e-3    | 2.6e-4    | 2.6e-3    |
| <b>vs. Stem PCs</b> | 4.7e-6    | 4.5e-5    | 7.5e-4    | 5.7e-5    | 5.7e-3    | 3.2e-3    | 1.2e-3    |
| <b>Lag (days)</b>   | <b>8</b>  | <b>9</b>  | <b>10</b> | <b>11</b> | <b>12</b> | <b>13</b> | <b>14</b> |
| <b>vs. Arm PCs</b>  | 0.059     | 0.032     | 0.013     | 0.064     | 0.015     | 3.2e-4    | 0.021     |
| <b>vs. Stem PCs</b> | 0.23      | 6.2e-3    | 1.2e-4    | 0.024     | 0.59      | 1.4e-3    | 0.44      |
| <b>Lag (days)</b>   | <b>15</b> | <b>16</b> |           |           |           |           |           |
| <b>vs. Arm PCs</b>  | 0.15      | 0.78      |           |           |           |           |           |
| <b>vs. Stem PCs</b> | 0.047     | 0.25      |           |           |           |           |           |

280

281

### 282 *Trajectory-Dependent Neurons Display a Rapid Onset Followed by Stable Activity*

283 Next, we examined the ontogeny of trajectory-dependent behavior. We hypothesized two  
 284 different scenarios could support the emergence of splitters. In line with a study showing that  
 285 unstable neurons can support well-learned behavior (Driscoll, Pettit, Minderer, Chettih, &  
 286 Harvey, 2017), splitters could slowly ramp up/down their splitting behavior or they could come  
 287 online suddenly and turn off just as suddenly. On the other hand, previous research presented the  
 288 idea that neurons pre-disposed to become place cells can come online suddenly after a head-  
 289 scanning/attention event (Monaco, Rao, Roth, & Knierim, 2014), which is potentially supported  
 290 by the presence of reliable sub-threshold depolarizations of those neurons caused by calcium  
 291 activity in its dendritic arbor (Bittner, Milstein, Grienberger, Romani, & Magee, 2017;  
 292 Diamantaki et al., 2018; Lee, Lin, & Lee, 2012; Sheffield & Dombeck, 2014, 2019). In line with

293 this idea, splitter neurons could rapidly develop trajectory-dependent activity and then maintain  
294 that activity thereafter. To address this question, we identified the day when each neuron we  
295 recorded first exhibited significant trajectory-dependent activity, and then tracked whether that  
296 neuron retained trajectory-dependent activity along a similar proportion of the maze stem  
297 (splitting extent) in subsequent sessions. We found evidence for heterogeneity in the ontogeny of  
298 splitting, with some neurons exhibiting a rapid onset of trajectory-dependent activity (Figure 6A)  
299 while others ramped up their trajectory-dependent activity in the days prior to becoming a splitter  
300 (Figure 6B). Each onset type appeared to maintain stable trajectory-dependent activity afterward  
301 since, for individual mice, splitting extent remained higher in the day following splitter onset  
302 when compared to the day preceding splitter onset (Figure 6C). The rapid onset of trajectory-  
303 dependent activity and stable maintenance thereafter was readily apparent when examining  
304 group data over longer time scales ( $\pm 10$  days, Figure 6D). We obtained similar results for peak  
305 reliability and peak discriminability along the stem (Figure 6E-F). In contrast, we observed only  
306 a weak trend for reliability and discriminability averaged along the whole stem (Figure S6),  
307 supporting the observation that splitter neurons maintained consistent trajectory-dependent  
308 activity along a local portion ( $\sim 10$ - $20\%$ ) of the stem after their onset. We observed a similar  
309 trend for place cells using mutual information as a metric of place coding strength (Figure 6G),  
310 suggesting that similar rules govern the onset and fate of trajectory-dependent and spatial coding  
311 in hippocampal neurons.



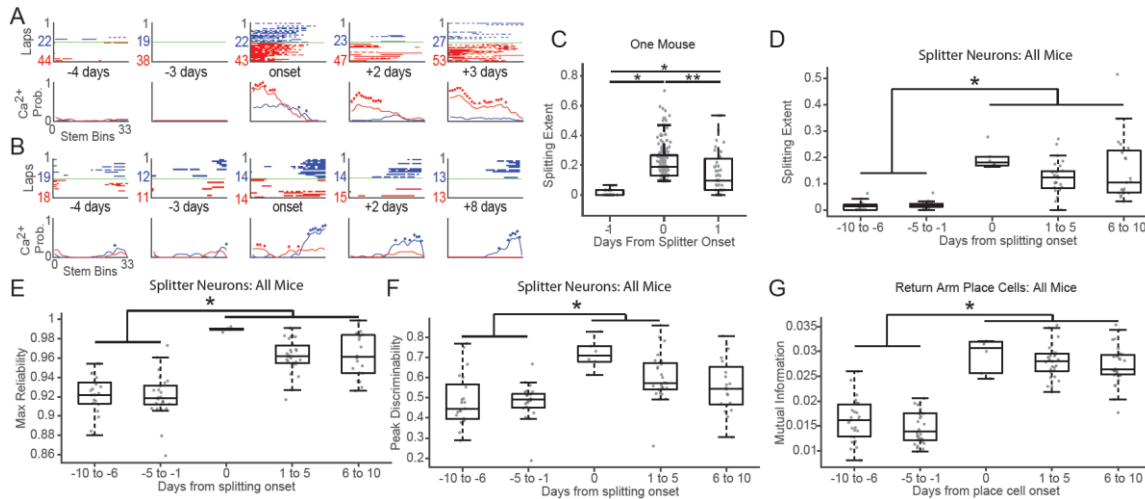

312

313 **Figure 6: Splitters Come Online Abruptly and Maintain Stable Fields**

- 314 A) and B) Example splitter across days for two different mice illustrating sudden onset of trajectory-  
 315 dependent activity followed by stable trajectory-dependent activity thereafter.  
 316 C) Extent of significant splitting (trajectory-dependent activity) along the stem +/- 1 days from  
 317 splitter onset for one representative mouse.  $p = 7.6 \times 10^{-19}$  Kruskal-Wallis ANOVA,  $*p < 1.0 \times 10^{-5}$ ,  
 318  $**p = 0.00025$  post-hoc Tukey test. Circles = splitting extent for each neuron.  
 319 D) Extent of splitting +/- 10 days from splitter onset for all mice.  $p = 3.1 \times 10^{-14}$  Kruskal-Wallis  
 320 ANOVA,  $*p < 6.0 \times 10^{-5}$  post-hoc Tukey test. Circles = mean splitting extent of all neurons active  
 321 on the stem for each session.  
 322 E) Max reliability score +/- 10 days from splitter onset for all mice.  $p = 2.8 \times 10^{-12}$  Kruskal-Wallis  
 323 ANOVA,  $*p < 2 \times 10^{-4}$  post-hoc Tukey test.  
 324 F) Mean discriminability score +/- 10 days from splitter onset for all mice.  $p = 4.7 \times 10^{-6}$  Kruskal-  
 325 Wallis ANOVA,  $*p < 0.003$  post-hoc Tukey test.  
 326 G) Mean mutual information +/- 10 days from return place cell onset for all mice. We obtained  
 327 similar results for stem place cell onset (data not shown).  $p = 4.7 \times 10^{-17}$  Kruskal-Wallis ANOVA,  
 328  $*p < 6 \times 10^{-4}$  post-hoc Tukey test.

329 ***Place Cell Onset Coincides With or Precedes Splitter Onset***

330 We next wondered if hippocampal neurons displayed significant spatial tuning before,  
 331 during, or after they exhibited trajectory-dependent firing. As shown above, splitter cells produce  
 332 accurate spatially-modulated activity (Figure 5) and have a similar onset/offset trajectory to place  
 333 cells (Figure 6); thus, we hypothesized that the onset of trajectory-dependent firing in  
 334 hippocampal neurons would either coincide with or follow their onset as place cells. To test this

335 idea, we first tallied the onset day of each cell phenotype. We found, while both functional  
336 phenotypes were present from day 1 and continued to come online throughout the experiment  
337 (Figure 7A,C), the bulk of place cells were recruited on day 1. In contrast, and in agreement with  
338 a previous study (Bower, Euston, & McNaughton, 2005), the recruitment of splitter cells did not  
339 peak until several days later (Figure 7A,C), suggesting that trajectory-dependent activity tended  
340 to emerge more slowly than spatial activity. This could occur independently in two different  
341 groups of neurons, or it could occur serially with each neuron first becoming a splitter cell only  
342 after becoming a place cell. Thus, to test if this delay in splitter cell ontogeny occurred in the  
343 same cells, we directly compared the day a cell became a place cell to the day it began to exhibit  
344 trajectory-dependent activity. We found that in the majority of neurons, trajectory-dependent  
345 activity onset occurred simultaneously with place field onset, while a different population of  
346 neurons exhibited trajectory-dependent activity only after first becoming place cells (Figure  
347 7B,D). Thus, place cells and splitter cells occupy an overlapping population of neurons with  
348 spatial responsivity coinciding with or preceding trajectory-dependent coding.

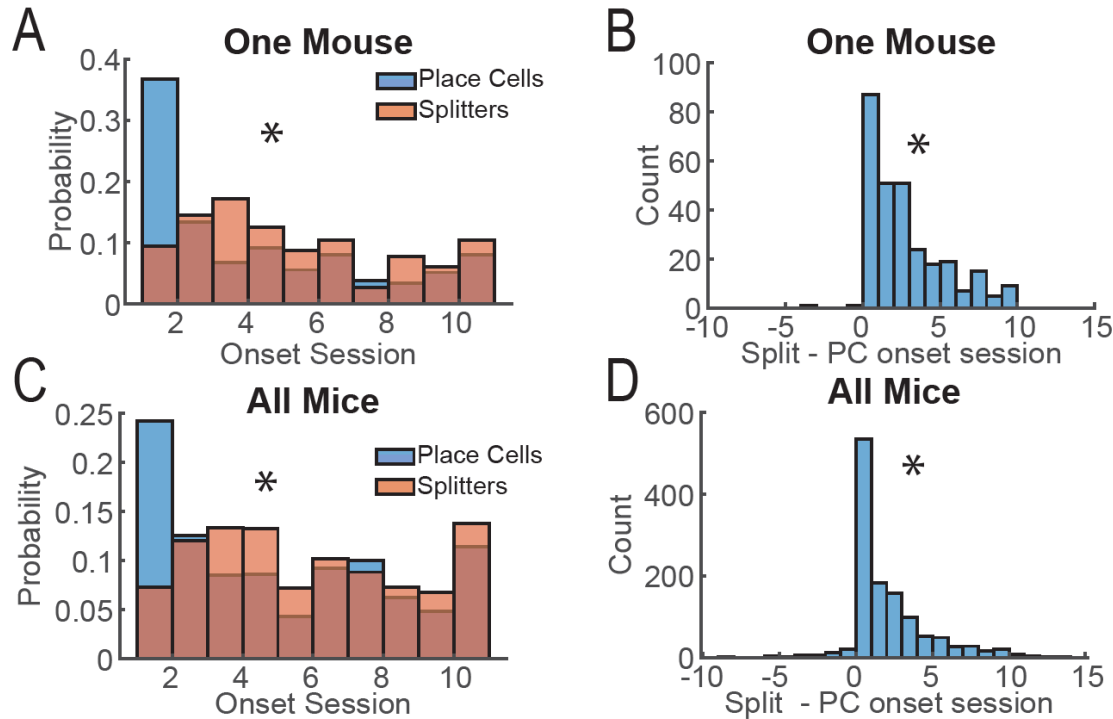

349

350 **Figure 7: Place Cell Onset Coincides With or Precedes Splitter Onset**

- 351 A) Histogram of the first (onset) day a neuron exhibits a splitter cell or place cell phenotype for  
 352 one mouse. \* $p = 3.7 \times 10^{-17}$ , one-sided Kolmogorov-Smirnov test.  
 353 B) Difference between splitter cell onset day and place cell onset day for one mouse.  
 354 \* $p = 2.5 \times 10^{-24}$   $\chi^2$  goodness-of-fit test, mean = 2.3, median = 2.  
 355 C) Same as A) but for all mice. \* $p = 2.2 \times 10^{-17}$ , one-sided Kolmogorov-Smirnov test.  
 356 D) Same as B) but for all mice. \* $p = 5.3 \times 10^{-107}$   $\chi^2$  goodness-of-fit test, mean = 1.6, median = 1.  
 357

## 358 DISCUSSION

359 From an evolutionary perspective, one adaptive function of memory is the ability to  
 360 provide information vital to survival. Thus, maintaining activity and consistency in neurons  
 361 encoding information pertinent to survival might provide a mechanism for preferentially  
 362 strengthening connections with downstream structures via consistent replay of the same  
 363 sequences (Buzsáki, 2015; Diba & Buzsáki, 2007; Louie & Wilson, 2001; Maboudi et al., 2018;  
 364 Pfeiffer & Foster, 2013). Conversely, if the pool of neurons available to encode a given memory  
 365 remains fixed, then forgetting of incidental information through the turnover/silencing of neurons

366 not required for survival is adaptive (Hardt, Nader, & Nadel, 2013) because it could increase the  
367 numbers of neurons available to encode other relevant information (Richards & Frankland,  
368 2017). Here, we utilized *in vivo* calcium imaging with miniaturized microscopes to explore this  
369 idea (Figure 1) by investigating the development and fate of trajectory-dependent splitter neurons  
370 (Frank et al., 2000; Wood et al., 2000) (Figure 2). To the best of our knowledge, this is the first  
371 demonstration that trajectory-dependent hippocampal activity exists in mice and that it can be  
372 detected with calcium imaging. Since trajectory-dependent splitter neurons contain information  
373 relevant to proper task performance (Figure 3, see also Ferbinteanu & Shapiro, 2003), we  
374 hypothesized that they would exhibit relatively high stability when compared to other neuron  
375 phenotypes.

376         Several lines of evidence support this hypothesis. First, splitter neurons are more likely to  
377 remain active across long time scales than neurons that only provide information about the  
378 animal's current location on the return arm (Figure 4). Second, splitters come online abruptly and  
379 then maintain a stable readout of trajectory up to 10 days after becoming a splitter (Figure 6).  
380 Splitters also provide a more consistent signal of the animal's current location than do other  
381 neurons (Figure 5), further supporting their long-term stability. Last, we found that splitter cells  
382 are a dynamic subpopulation of place cells with the onset of place coding generally preceding the  
383 onset of trajectory-dependent activity (Figure 7). This finding concurs with the slow increase of  
384 trajectory-dependent activity with experience found in a previous study (Bower et al., 2005).  
385 These data combined support the idea that neuron phenotype influences its subsequent stability  
386 (Zaremba et al., 2017) and the consistency of the information it provides to downstream  
387 structures. More broadly, this study supports the idea that adaptive memories are encoded in a  
388 relatively stable subpopulation of neurons, freeing the remaining pool of neurons to undergo

389 plasticity during new learning (Grosmark & Buzsáki, 2016; van de Ven, Trouche, McNamara,  
390 Allen, & Dupret, 2016). However, how downstream regions can utilize a constantly changing  
391 landscape of hippocampal inputs to guide behavior remains an open question, as place fields  
392 along the stem drift steadily backwards throughout each session (Figure S2) and day-to-day  
393 turnover even in relatively stable splitter neurons can still sometimes be quite high (Figure  
394 4C,E).

395 Our study utilizes single-photon imaging to perform longitudinal tracking of hippocampal  
396 neuron activity and confirms existing studies that show increasing turnover of coactive neurons  
397 with time (Cai et al., 2016; Rubin et al., 2015; Ziv et al., 2013). However, a recent study  
398 performed in songbirds demonstrated that imaging artifacts, specifically small shifts in the z-  
399 plane of single-photon imaging, could entirely account for putative cell turnover (Katlowitz,  
400 Picardo, & Long, 2018). Thus, the turnover we and others observe in hippocampal neurons could  
401 likewise be artefactual. While relevant, this concern is mitigated in our study for a number of  
402 reasons. First, the Katlowitz et al. (2018) study was performed in the basal ganglia of songbirds  
403 while they performed a stereotyped behavior supported by highly stable firing responses of  
404 neurons over short and long timescales (Guitchounts, Markowitz, Liberti, & Gardner, 2013;  
405 Hahnloser, Kozhevnikov, & Fee, 2002; Margoliash & Yu, 2009). In contrast, our study was  
406 performed in CA1 of the mouse hippocampus, a highly plastic brain region exhibiting complete,  
407 monthly turnover of afferent connections (Attardo, Fitzgerald, & Schnitzer, 2015; Pfeiffer et al.,  
408 2018) that also exhibits a high degree of drift in neuron firing responses over relatively short  
409 time-scales (Mankin et al., 2012; Manns et al., 2007). Second, studies utilizing activity-  
410 dependent tagging of neurons also find that the overlap between active cells in the mouse  
411 hippocampus declines with time between sessions (Cai et al., 2016; Kitamura et al., 2017),

412 supporting long-term hippocampal cell turnover as a real phenomenon. Most importantly, our  
413 study compares the *relative* turnover rates of two different cell phenotypes: splitter cells and  
414 place cells. Thus, even if day-to-day misalignments in the z-plane forced neurons out of focus,  
415 this would occur equally for both splitters and place cells. Therefore, concerns about imaging  
416 artifacts cannot explain our finding that splitter cells are more persistently active across long time  
417 scales than place cells.

418         One notable study found that lesions or optogenetic silencing of nucleus reuniens, an  
419 important communication hub between the medial prefrontal cortex and dorsal CA1 of the  
420 hippocampus, significantly reduced trajectory-dependent activity in rat CA1 neurons while  
421 having no impact on a rat's performance of a spatial alternation task (Ito et al., 2015). Those  
422 results directly challenge our finding that the quality of trajectory-dependent information  
423 contained in CA1 activity patterns correlates with a mouse's performance (Figure 3). One  
424 potential reason for this discrepancy is that their intervention only partially reduced trajectory-  
425 dependent information without eliminating it, allowing the splitter cells remaining to provide  
426 adequate information for proper task performance. In fact, optogenetic silencing of nucleus  
427 reuniens produced a smaller deficit in trajectory-dependent activity than did lesions; even lesions  
428 eliminated trajectory-dependent activity predicting future trajectories only. Information related to  
429 past trajectories, which could be utilized by downstream structures to help make the correct  
430 upcoming turn, was maintained. Second, relatively easy tasks might be less resistant to a partial  
431 disruption and rats performed at close to ceiling levels in the Ito et al. (2015) study. Our mice  
432 performed at lower levels, though still well above chance, indicating that the spatial alternation  
433 task might place higher attentional and cognitive demands on mice than on rats. Last, Ito et al.  
434 (2015) also utilized the difference in peak firing rate on left versus right trials as a metric for

435 trajectory-dependent activity. This calculation does not account for trajectory-dependent  
436 information provided by neurons that maintain similar firing rates, but shift their firing location  
437 along the stem between left and right trials (see Figure 2B). Thus, trajectory-dependent neural  
438 activity could still be important for proper task performance.

439       Rodents with hippocampal lesions are capable of performing a continuous alternation task  
440 (Ainge, van der Meer, Langston, & Wood, 2007). This raises the question: how important is  
441 trajectory-dependent activity if mice can perform the task without the hippocampus at all? We  
442 have two responses to this question. First, long-term lesions test necessity, not sufficiency, since  
443 these lesions can induce compensatory plasticity that could allow non-hippocampal regions to  
444 support the task (Packard & McGaugh, 1996). Second, under normal conditions the  
445 hippocampus might still be the default brain region for task performance in spatial alternation.  
446 This is emphasized by Goshen et al. (2011), who demonstrated that mice cannot perform long-  
447 term recall of a putatively hippocampal-independent contextual fear memory (Bontempi,  
448 Laurent-Demir, Destrade, & Jaffard, 1999; Debiec, LeDoux, & Nader, 2002; Frankland,  
449 Bontempi, Talton, Kaczmarek, & Silva, 2004; Kim & Fanselow, 1992; Kitamura et al., 2017,  
450 2009; Winocur, Frankland, Sekeres, Fogel, & Moscovitch, 2009) when hippocampal inactivation  
451 is limited to a short time period before the task; however, mice became capable of successful  
452 long-term memory recall when this inactivation was extended over a long time period prior to  
453 performing the task. This study and others (Meira et al., 2018; Sparks, Lehmann, Hernandez, &  
454 Sutherland, 2011; Sutherland, O'Brien, & Lehmann, 2008; Wang, Teixeira, Wheeler, &  
455 Frankland, 2009; Wiltgen et al., 2010) support the idea that the hippocampus is vital for long-  
456 term recall under normal conditions and that redundant pathways are recruited for episodic  
457 memory retrieval only if chronic aberrant activity is detected in the hippocampus.

458           Through what mechanism do trajectory-dependent neurons maintain greater stability  
459 across long time-scales? After the initial onset of trajectory-dependent behavior, these neurons  
460 could receive feedback from dopaminergic neurons originating in the ventral tegmental area  
461 (VTA) during learning (Gomperts, Kloosterman, & Wilson, 2015) or from locus coeruleus (LC)  
462 neurons during post-learning sleep (Takeuchi et al., 2016) that could strengthen afferent  
463 connections to splitter neurons. This could also occur during sharp-wave ripple related replay of  
464 prior trajectories (Diba & Buzsáki, 2007; Pfeiffer & Foster, 2013) in conjunction with  
465 simultaneous dopaminergic inputs from VTA (Gomperts et al., 2015). However, this mechanism  
466 would also strengthen all cells active en route to the goal location whether they carried  
467 information about trajectory or not. One recent study found that trajectories leading to larger  
468 rewards were preferentially replayed over trajectories leading to smaller rewards (Michon, Sun,  
469 Kim, Ciliberti, & Kloosterman, 2019). Thus, one possibility is that since trajectory-dependent  
470 neurons are more useful for predicting how to obtain reward than pure place cells, they might be  
471 preferentially reactivated during sharp-wave ripple events, an idea that warrants future testing.

472           Taken together, our results highlight the influence of cell phenotype on its subsequent  
473 stability, and suggest that the emergence of task-related trajectory-dependent coding coincides  
474 with or follows the emergence of spatial coding in neurons. Future work should investigate  
475 mechanisms supporting the stability and emergence of trajectory-dependent neurons.

476

## 477 **REFERENCES**

478 Ainge, J. A., van der Meer, M. a a, Langston, R. F., & Wood, E. R. (2007). Exploring the role of  
479 context-dependent hippocampal activity in spatial alternation behavior. *Hippocampus*,  
480 *17*(10), 988–1002. <https://doi.org/10.1002/hipo.20301>



- 481 Albouy, G., Sterpenich, V., Balteau, E., Vandewalle, G., Desseilles, M., Dang-Vu, T., ...  
482 Maquet, P. (2008). Both the Hippocampus and Striatum Are Involved in Consolidation of  
483 Motor Sequence Memory. *Neuron*, 58(2), 261–272.  
484 <https://doi.org/10.1016/j.neuron.2008.02.008>
- 485 Aronov, D., Nevers, R., & Tank, D. W. (2017). Mapping of a non-spatial dimension by the  
486 hippocampal–entorhinal circuit. *Nature*, 543(7647), 719–722.  
487 <https://doi.org/10.1038/nature21692>
- 488 Attardo, A., Fitzgerald, J. E., & Schnitzer, M. J. (2015). Impermanence of dendritic spines in live  
489 adult CA1 hippocampus. *Nature*, 523(7562), 592–596. <https://doi.org/10.1038/nature14467>
- 490 Bittner, K. C., Milstein, A. D., Grienberger, C., Romani, S., & Magee, J. C. (2017). Behavioral  
491 time scale synaptic plasticity underlies CA1 place fields. *Science*, 357(6355), 1033–1036.  
492 <https://doi.org/10.1126/science.aan3846>
- 493 Bontempi, B., Laurent-Demir, C., Destrade, C., & Jaffard, R. (1999). Time-dependent  
494 reorganization of brain circuitry underlying long-term memory storage. *Nature*, 400(6745),  
495 671–675. <https://doi.org/10.1038/23270>
- 496 Bower, M. R., Euston, D. R., & McNaughton, B. L. (2005). Sequential-Context-Dependent  
497 Hippocampal Activity Is Not Necessary to Learn Sequences with Repeated Elements. *The*  
498 *Journal of Neuroscience*, 25(6), 1313–1323. [https://doi.org/10.1523/JNEUROSCI.2901-](https://doi.org/10.1523/JNEUROSCI.2901-04.2005)  
499 [04.2005](https://doi.org/10.1523/JNEUROSCI.2901-04.2005)
- 500 Buzsáki, G. (2015). Hippocampal sharp wave-ripple: A cognitive biomarker for episodic  
501 memory and planning. *Hippocampus*, 25(10), 1073–1188.  
502 <https://doi.org/10.1002/hipo.22488>
- 503 Cai, D. J., Aharoni, D., Shuman, T., Shobe, J., Biane, J., Lou, J., ... Silva, A. J. (2016). A shared

- 504 neural ensemble links distinct contextual memories encoded close in time. *Nature*, 534,  
505 115–118. <https://doi.org/10.1038/nature17955>
- 506 Corkin, S. (1984). Lasting Consequences of Bilateral Medial Temporal Lobectomy: Clinical  
507 Course and Experimental Findings in H.M. *Seminars in Neurology*.  
508 <https://doi.org/10.1055/s-2008-1041556>
- 509 Debiec, J., LeDoux, J. E., & Nader, K. (2002). Cellular and systems reconsolidation in the  
510 hippocampus. *Neuron*, 36(3), 527–538. Retrieved from  
511 <http://www.ncbi.nlm.nih.gov/pubmed/12408854>
- 512 Diamantaki, M., Coletta, S., Nasr, K., Zeraati, R., Laturus, S., Berens, P., ... Burgalossi, A.  
513 (2018). Manipulating Hippocampal Place Cell Activity by Single-Cell Stimulation in Freely  
514 Moving Mice. *Cell Reports*, 23(1), 32–38. <https://doi.org/10.1016/j.celrep.2018.03.031>
- 515 Diba, K., & Buzsáki, G. (2007). Forward and reverse hippocampal place-cell sequences during  
516 ripples. *Nature Neuroscience*, 10(10), 1241–1242. <https://doi.org/10.1038/nn1961>
- 517 Driscoll, L. N., Pettit, N. L., Minderer, M., Chettih, S. N., & Harvey, C. D. (2017). Dynamic  
518 Reorganization of Neuronal Activity Patterns in Parietal Cortex. *Cell*, 170(5), 986–999.e16.  
519 <https://doi.org/10.1016/j.cell.2017.07.021>
- 520 Dupret, D., O'Neill, J., Pleydell-Bouverie, B., & Csicsvari, J. (2010). The reorganization and  
521 reactivation of hippocampal maps predict spatial memory performance. *Nature*  
522 *Neuroscience*, 13(8), 995–1002. <https://doi.org/10.1038/nn.2599>
- 523 Eichenbaum, H. B. (2004). Hippocampus: Cognitive processes and neural representations that  
524 underlie declarative memory. *Neuron*, 44(1), 109–120.  
525 <https://doi.org/10.1016/j.neuron.2004.08.028>
- 526 Ekstrom, A. D., Kahana, M. J., Caplan, J. B., Fields, T. A., Isham, E. A., Newman, E. L., &

- 527 Fried, I. (2003). Cellular networks underlying human spatial navigation. *Nature*, *425*(6954),  
528 184–188. <https://doi.org/10.1038/nature01964>
- 529 Ferbinteanu, J. D., & Shapiro, M. L. (2003). Prospective and retrospective memory coding in the  
530 hippocampus. *Neuron*, *40*(6), 1227–1239. [https://doi.org/10.1016/S0896-6273\(03\)00752-9](https://doi.org/10.1016/S0896-6273(03)00752-9)
- 531 Frank, L. M., Brown, E. N., & Wilson, M. A. (2000). Trajectory encoding in the hippocampus  
532 and entorhinal cortex. *Neuron*, *27*(1), 169–178. Retrieved from  
533 <http://www.ncbi.nlm.nih.gov/pubmed/10939340>
- 534 Frankland, P. W., Bontempi, B., Talton, L. E., Kaczmarek, L., & Silva, A. J. (2004). The  
535 involvement of the anterior cingulate cortex in remote contextual fear memory. *Science*,  
536 *304*(5672), 881–883. <https://doi.org/10.1126/science.1094804>
- 537 Geva-Sagiv, M., Romani, S., Las, L., & Ulanovsky, N. (2016). Hippocampal global remapping  
538 for different sensory modalities in flying bats. *Nature Neuroscience*, *19*(May), 1–11.  
539 <https://doi.org/10.1038/nn.4310>
- 540 Gomperts, S. N., Kloosterman, F., & Wilson, M. A. (2015). VTA neurons coordinate with the  
541 hippocampal reactivation of spatial experience. *ELife*, *4*(OCTOBER2015), 1–22.  
542 <https://doi.org/10.7554/eLife.05360.001>
- 543 Goshen, I., Brodsky, M., Prakash, R., Wallace, J., Gradinaru, V., Ramakrishnan, C., &  
544 Deisseroth, K. (2011). Dynamics of retrieval strategies for remote memories. *Cell*, *147*(3),  
545 678–689. <https://doi.org/10.1016/j.cell.2011.09.033>
- 546 Grosmark, A. D., & Buzsáki, G. (2016). Diversity in neural firing dynamics supports both rigid  
547 and learned hippocampal sequences. *Science*, *351*(6280), 1440–1443.  
548 <https://doi.org/10.1126/science.aad1935>
- 549 Guitchoyts, G., Markowitz, J. E., Liberti, W. A., & Gardner, T. J. (2013). A carbon-fiber

- 550 electrode array for long-term neural recording. *Journal of Neural Engineering*, 10(4),  
551 046016. <https://doi.org/10.1088/1741-2560/10/4/046016>
- 552 Hahnloser, R. H. R., Kozhevnikov, A. A., & Fee, M. S. (2002). An ultra-sparse code underlies the  
553 generation of neural sequences in a songbird. *Nature*, 419(6902), 65–70.  
554 <https://doi.org/10.1038/nature00974>
- 555 Hardt, O., Nader, K., & Nadel, L. (2013). Decay happens: The role of active forgetting in  
556 memory. *Trends in Cognitive Sciences*, 17(3), 111–120.  
557 <https://doi.org/10.1016/j.tics.2013.01.001>
- 558 Howard, M. W., MacDonald, C. J., Tiganj, Z., Shankar, K. H., Du, Q., Hasselmo, M. E., &  
559 Eichenbaum, H. (2014). A Unified Mathematical Framework for Coding Time, Space, and  
560 Sequences in the Hippocampal Region. *Journal of Neuroscience*, 34(13), 4692–4707.  
561 <https://doi.org/10.1523/jneurosci.5808-12.2014>
- 562 Ito, H. T., Zhang, S. J., Witter, M. P., Moser, E. I., & Moser, M.-B. (2015). A prefrontal-  
563 thalamo-hippocampal circuit for goal-directed spatial navigation. *Nature*, 522(7554), 50–55.  
564 <https://doi.org/10.1038/nature14396>
- 565 Kahn, K., Johnson, M., González-Martínez, J., Park, H.-J., Bulacio, J., Thompson, S., ... Kerr,  
566 M. S. D. (2017). The Role of Associative Cortices and Hippocampus during Movement  
567 Perturbations. *Frontiers in Neural Circuits*, 11(April), 1–11.  
568 <https://doi.org/10.3389/fncir.2017.00026>
- 569 Katlowitz, K. A., Picardo, M. A., & Long, M. A. (2018). Stable Sequential Activity Underlying  
570 the Maintenance of a Precisely Executed Skilled Behavior. *Neuron*, 98(6), 1133-1140.e3.  
571 <https://doi.org/10.1016/j.neuron.2018.05.017>
- 572 Kentros, C. G., Agnihotri, N. T., Streater, S., Hawkins, R. D., & Kandel, E. R. (2004). Increased

573 attention to spatial context increases both place field stability and spatial memory. *Neuron*,  
574 42(2), 283–295. [https://doi.org/10.1016/S0896-6273\(04\)00192-8](https://doi.org/10.1016/S0896-6273(04)00192-8)

575 Kim, J. J., & Fanselow, M. S. (1992). Modality-specific retrograde amnesia of fear. *Science*,  
576 256(5057), 675–677. Retrieved from <http://www.ncbi.nlm.nih.gov/pubmed/1585183>

577 Kinsky, N. R., Sullivan, D. W., Mau, W., Hasselmo, M. E., & Eichenbaum, H. B. (2018).  
578 Hippocampal Place Fields Maintain a Coherent and Flexible Map across Long Timescales.  
579 *Current Biology*, 28(22), 1–11. <https://doi.org/10.1016/J.CUB.2018.09.037>

580 Kitamura, T., Ogawa, S. K., Roy, D. S., Okuyama, T., Morrissey, M. D., Smith, L. M., ...  
581 Tonegawa, S. (2017). Engrams and circuits crucial for systems consolidation of a memory.  
582 *Science*, 78(April), 73–78. <https://doi.org/10.1126/science.aam6808>

583 Kitamura, T., Saitoh, Y., Takashima, N., Murayama, A., Niibori, Y., Agayby, B., ... Inokuchi,  
584 K. (2009). Adult neurogenesis modulates the hippocampus-dependent period of associative  
585 fear memory. *Cell*, 139(4), 814–827. <https://doi.org/10.1016/j.cell.2009.10.020>

586 Kraus, B. J., Robinson II, R. J., White, J. A., Eichenbaum, H. B., & Hasselmo, M. E. (2013).  
587 Hippocampal “Time Cells”: Time versus Path Integration. *Neuron*, 78(6), 1090–1101.  
588 <https://doi.org/10.1016/j.neuron.2013.04.015>

589 Lee, D., Lin, B.-J., & Lee, A. K. (2012). Hippocampal Place Fields Emerge upon Single-Cell  
590 Manipulation of Excitability During Behavior. *Science*, 337(6096), 849–853.  
591 <https://doi.org/10.1126/science.1221489>

592 Louie, K., & Wilson, M. A. (2001). Temporally structured replay of awake hippocampal  
593 ensemble activity during rapid eye movement sleep. *Neuron*, 29(1), 145–156.  
594 [https://doi.org/10.1016/S0896-6273\(01\)00186-6](https://doi.org/10.1016/S0896-6273(01)00186-6)

595 Maboudi, K., Acsády, L., de Jong, L. W., Pfeiffer, B. E., Foster, D. J., Diba, K., & Kemere, C.

- 596 (2018). Uncovering temporal structure in hippocampal output patterns. *ELife*, 7, e34467.  
597 <https://doi.org/10.7554/eLife.34467>
- 598 MacDonald, C. J., Lepage, K. Q., Eden, U. T., & Eichenbaum, H. B. (2011). Hippocampal “time  
599 cells” bridge the gap in memory for discontinuous events. *Neuron*, 71(4), 737–749.  
600 <https://doi.org/10.1016/j.neuron.2011.07.012>
- 601 Mankin, E. A., Sparks, F. T., Slayyeh, B., Sutherland, R. J., Leutgeb, S., & Leutgeb, J. K.  
602 (2012). Neuronal code for extended time in the hippocampus. *Proceedings of the National  
603 Academy of Sciences*, 109(47), 19462–19467. [https://doi.org/10.1073/pnas.1214107109/-  
604 /DCSupplemental.www.pnas.org/cgi/doi/10.1073/pnas.1214107109](https://doi.org/10.1073/pnas.1214107109/-/DCSupplemental.www.pnas.org/cgi/doi/10.1073/pnas.1214107109)
- 605 Manns, J. R., Howard, M. W., & Eichenbaum, H. B. (2007). Gradual Changes in Hippocampal  
606 Activity Support Remembering the Order of Events. *Neuron*, 56, 530–540.  
607 <https://doi.org/10.1016/j.neuron.2007.08.017>
- 608 Margoliash, D., & Yu, A. C. (2009). Temporal Hierarchical Control of Singing in Birds. *Science*,  
609 273(5283), 1871–1875.
- 610 Mau, W., Sullivan, D. W., Kinsky, N. R., Hasselmo, M. E., Howard, M. W., & Eichenbaum, H.  
611 B. (2018). The Same Hippocampal CA1 Population Simultaneously Codes Temporal  
612 Information over Multiple Timescales. *Current Biology*, 28(10), 1499-1508.e4.  
613 <https://doi.org/10.1016/j.cub.2018.03.051>
- 614 McKenzie, S., Robinson, N. T. M., Herrera, L., Churchill, J. C., & Eichenbaum, H. B. (2013).  
615 Learning Causes Reorganization of Neuronal Firing Patterns to Represent Related  
616 Experiences within a Hippocampal Schema. *The Journal of Neuroscience*, 33(25), 10243–  
617 10256. <https://doi.org/10.1523/JNEUROSCI.0879-13.2013>
- 618 Mehta, M. R., Quirk, M. C., & Wilson, M. A. (2000). Experience-dependent asymmetric shape

619 of hippocampal receptive fields. *Neuron*, 25(3), 707–715. <https://doi.org/10.1016/S0896->  
620 6273(00)81072-7

621 Meira, T., Leroy, F., Buss, E. W., Oliva, A., Park, J., & Siegelbaum, S. A. (2018). A  
622 hippocampal circuit linking dorsal CA2 to ventral CA1 critical for social memory  
623 dynamics. *Nature Communications*, (2018), 1–14. <https://doi.org/10.1038/s41467-018->  
624 06501-w

625 Michon, F., Sun, J. J., Kim, C. Y., Ciliberti, D., & Kloosterman, F. (2019). Post-learning  
626 Hippocampal Replay Selectively Reinforces Spatial Memory for Highly Rewarded  
627 Locations. *Current Biology*, 29(9), 1436-1444.e5. <https://doi.org/10.1016/j.cub.2019.03.048>

628 Miller, J. F., Neufang, M., Solway, A., Brandt, A., Trippel, M., Mader, I., ... Schulze-Bonhage,  
629 A. (2013). Neural Activity in Human Spatial Context of Retrieved Memories. *Science*,  
630 342(1111–1114).

631 Milner, B., Corkin, S., & Teuber, H. L. (1968). Further analysis of the hippocampal amnesic  
632 syndrome: 14-year follow-up study of H.M. *Neuropsychologia*, 6(3), 215–234.  
633 [https://doi.org/10.1016/0028-3932\(68\)90021-3](https://doi.org/10.1016/0028-3932(68)90021-3)

634 Monaco, J. D., Rao, G., Roth, E. D., & Knierim, J. J. (2014). Attentive scanning behavior drives  
635 one-trial potentiation of hippocampal place fields. *Nature Neuroscience*, 17(5), 725–731.  
636 <https://doi.org/10.1038/nn.3687>

637 Morris, R. G. M., Garrud, P., Rawlins, J. N., & O’Keefe, J. (1982). Place navigation impaired in  
638 rats with hippocampal lesions. *Nature*, 297(5868), 681–683. Retrieved from  
639 <http://www.ncbi.nlm.nih.gov/pubmed/7088155>

640 Muller, R. U., & Kubie, J. L. (1987). The effects of changes in the environment on the spatial  
641 firing of hippocampal complex-spike cells. *The Journal of Neuroscience*, 7(7), 1951–1968.

- 642 Retrieved from <http://www.ncbi.nlm.nih.gov/pubmed/3612226>
- 643 Muller, R. U., Kubie, J. L., & Ranck, J. B. (1987). Spatial firing patterns of hippocampal  
644 complex-spike cells in a fixed environment. *The Journal of Neuroscience*, 7(7), 1935–1950.  
645 [https://doi.org/10.1016/S0301-0082\(96\)00019-6](https://doi.org/10.1016/S0301-0082(96)00019-6)
- 646 Muzzio, I. A., Levita, L., Kulkarni, J., Monaco, J., Kentros, C. G., Stead, M., ... Kandel, E. R.  
647 (2009). Attention enhances the retrieval and stability of visuospatial and olfactory  
648 representations in the dorsal hippocampus. *PLoS Biology*, 7(6).  
649 <https://doi.org/10.1371/journal.pbio.1000140>
- 650 Niediek, J., & Bain, J. (2014). Human single-unit recordings reveal a link between place-cells  
651 and episodic memory. *Frontiers in Systems Neuroscience*, 8(6954), 184–187.  
652 <https://doi.org/10.3389/fnsys.2014.00158>
- 653 O’Keefe, J. (1976). Place Units in the Hippocampus of the Freely Moving Rat. *Experimental*  
654 *Neurology*, 51(1), 78–109.
- 655 O’Keefe, J., & Dostrovsky, J. O. (1971). The hippocampus as a spatial map . Preliminary  
656 evidence from unit activity in the freely-moving rat. *Brain Research*, 34(1), 171–175.
- 657 Packard, M. G., & McGaugh, J. L. (1996). Inactivation of hippocampus or caudate nucleus with  
658 lidocaine differentially affects expression of place and response learning. *Neurobiology of*  
659 *Learning and Memory*, 65(1), 65–72. <https://doi.org/10.1006/nlme.1996.0007>
- 660 Pastalkova, E., Itskov, V., Amarasingham, A., & Buzsáki, G. (2008). Internally Generated Cell  
661 Assembly Sequences in the Rat Hippocampus. *Science*, 321(September), 1322–1328.
- 662 Pfeiffer, B. E., & Foster, D. J. (2013). Hippocampal place-cell sequences depict future paths to  
663 remembered goals. *Nature*, 497(7447), 74–79. <https://doi.org/10.1038/nature12112>
- 664 Pfeiffer, T., Poll, S., Bancelin, S., Angibaud, J., Inavalli, V. K., Keppler, K., ... Nägerl, U. V.



- 665 (2018). Chronic 2P-STED imaging reveals high turnover of dendritic spines in the  
666 hippocampus in vivo. *ELife*, 7, 1–17. <https://doi.org/10.7554/elife.34700>
- 667 Resendez, S. L., Jennings, J. H., Ung, R. L., Namboodiri, V. M. K., Zhou, Z. C., Otis, J. M., ...  
668 Stuber, G. D. (2016). Visualization of cortical, subcortical and deep brain neural circuit  
669 dynamics during naturalistic mammalian behavior with head-mounted microscopes and  
670 chronically implanted lenses. *Nature Protocols*, 11(3), 566–597.  
671 <https://doi.org/10.1038/nprot.2016.021>
- 672 Richards, B. A., & Frankland, P. W. (2017). The Persistence and Transience of Memory.  
673 *Neuron*, 94(6), 1071–1084. <https://doi.org/10.1016/j.neuron.2017.04.037>
- 674 Robinson, N. T. M., Priestley, J. B., Rueckemann, J. W., Garcia, A. D., Smeglin, V. A., Marino,  
675 F. A., & Eichenbaum, H. B. (2017). Medial Entorhinal Cortex Selectively Supports  
676 Temporal Coding by Hippocampal Neurons. *Neuron*, 94(3), 677–688.e6.  
677 <https://doi.org/10.1016/j.neuron.2017.04.003>
- 678 Rubin, A., Geva, N., Sheintuch, L., & Ziv, Y. (2015). Hippocampal ensemble dynamics  
679 timestamp events in long-term memory. *ELife*, 4(December), 1–16.  
680 <https://doi.org/10.7554/eLife.12247>
- 681 Salz, D. M., Tiganj, Z., Khasnabish, S., Kohley, A., Sheehan, D., Howard, M. W., &  
682 Eichenbaum, H. B. (2016). Time Cells in Hippocampal Area CA3. *The Journal of*  
683 *Neuroscience*, 36(28), 7476–7484. <https://doi.org/10.1523/JNEUROSCI.0087-16.2016>
- 684 Sheffield, M. E. J., & Dombeck, D. A. (2014). Calcium transient prevalence across the dendritic  
685 arbour predicts place field properties. *Nature*, 517(7533), 200–204.  
686 <https://doi.org/10.1038/nature13871>
- 687 Sheffield, M. E. J., & Dombeck, D. A. (2019). Dendritic mechanisms of hippocampal place field

- 688 formation. *Current Opinion in Neurobiology*, 54, 1–11.  
689 <https://doi.org/10.1016/j.conb.2018.07.004>
- 690 Smith, D. M., & Mizumori, S. J. Y. (2006a). Hippocampal place cells, context, and episodic  
691 memory. *Hippocampus*, 16(9), 716–729. <https://doi.org/10.1002/hipo.20208>
- 692 Smith, D. M., & Mizumori, S. J. Y. (2006b). Learning-Related Development of Context-Specific  
693 Neuronal Responses to Places and Events: The Hippocampal Role in Context Processing.  
694 *The Journal of Neuroscience*, 26(12), 3154–3163.  
695 <https://doi.org/10.1523/JNEUROSCI.3234-05.2006>
- 696 Sparks, F. T., Lehmann, H., Hernandez, K., & Sutherland, R. J. (2011). Suppression of  
697 neurotoxic lesion-induced seizure activity: Evidence for a permanent role for the  
698 hippocampus in contextual memory. *PLoS ONE*, 6(11).  
699 <https://doi.org/10.1371/journal.pone.0027426>
- 700 Sutherland, R. J., O'Brien, J., & Lehmann, H. (2008). Absence of systems consolidation of fear  
701 memories after dorsal, ventral, or complete hippocampal damage. *Hippocampus*, 18(7),  
702 710–718. <https://doi.org/10.1002/hipo.20431>
- 703 Takeuchi, T., Duzskiewicz, A. J., Sonneborn, A., Spooner, P. A., Yamasaki, M., Watanabe, M.,  
704 ... Morris, R. G. M. (2016). Locus coeruleus and dopaminergic consolidation of everyday  
705 memory. *Nature*, 1–18. <https://doi.org/10.1038/nature19325>
- 706 van de Ven, G. M., Trouche, S., McNamara, C. G., Allen, K., & Dupret, D. (2016). Hippocampal  
707 Offline Reactivation Consolidates Recently Formed Cell Assembly Patterns during Sharp  
708 Wave-Ripples. *Neuron*, 1–7. <https://doi.org/10.1016/j.neuron.2016.10.020>
- 709 Vorhees, C. V., & Williams, M. T. (2014). Assessing spatial learning and memory in rodents.  
710 *ILAR Journal*, 55(2), 310–332. <https://doi.org/10.1093/ilar/ilu013>

- 711 Wang, S.-H., Teixeira, C. M., Wheeler, A. L., & Frankland, P. W. (2009). The precision of  
712 remote context memories does not require the hippocampus. *Nature Neuroscience*, *12*, 253–  
713 255. <https://doi.org/10.1038/nn.2263>
- 714 Wiltgen, B. J., Zhou, M., Cai, Y., Balaji, J., Karlsson, M. G., Parivash, S. N., ... Silva, A. J.  
715 (2010). The hippocampus plays a selective role in the retrieval of detailed contextual  
716 memories. *Current Biology : CB*, *20*(15), 1336–1344.  
717 <https://doi.org/10.1016/j.cub.2010.06.068>
- 718 Winocur, G., Frankland, P. W., Sekeres, M., Fogel, S., & Moscovitch, M. (2009). Changes in  
719 context-specificity during memory reconsolidation: selective effects of hippocampal  
720 lesions. *Learning & Memory (Cold Spring Harbor, N.Y.)*, *16*(11), 722–729.  
721 <https://doi.org/10.1101/lm.1447209>
- 722 Wise, S. P., & Murray, E. A. (1999). Role of the hippocampal system in conditional motor  
723 learning: Mapping antecedents to action. *Hippocampus*, *9*(2), 101–117.  
724 [https://doi.org/10.1002/\(SICI\)1098-1063\(1999\)9:2<101::AID-HIPO3>3.0.CO;2-L](https://doi.org/10.1002/(SICI)1098-1063(1999)9:2<101::AID-HIPO3>3.0.CO;2-L)
- 725 Wood, E. R., Dudchenko, P. A., & Eichenbaum, H. B. (1999). The global record of memory in  
726 hippocampal neuronal activity. *Nature*, *397*(6720), 613–616. <https://doi.org/10.1038/17605>
- 727 Wood, E. R., Dudchenko, P. A., Robitsek, R. J., & Eichenbaum, H. B. (2000). Hippocampal  
728 neurons encode information about different types of memory episodes occurring in the same  
729 location. *Neuron*, *27*(3), 623–633. Retrieved from  
730 <http://www.ncbi.nlm.nih.gov/pubmed/11055443>
- 731 Zaremba, J. D., Diamantopoulou, A., Danielson, N. B., Grosmark, A. D., Kaifosh, P. W.,  
732 Bowler, J. C., ... Losonczy, A. (2017). Impaired hippocampal place cell dynamics in a  
733 mouse model of the 22q11.2 deletion. *Nature Neuroscience*, *20*(11), 1612–1623.

734 <https://doi.org/10.1038/nn.4634>

735 Ziv, Y., Burns, L. D., Cocker, E. D., Hamel, E. O., Ghosh, K. K., Kitch, L. J., ... Schnitzer, M. J.

736 (2013). Long-term dynamics of CA1 hippocampal place codes. *Nature Neuroscience*, 16(3),

737 264–266. <https://doi.org/10.1038/nn.3329>

738

739 **SUPPLEMENTAL FIGURES**

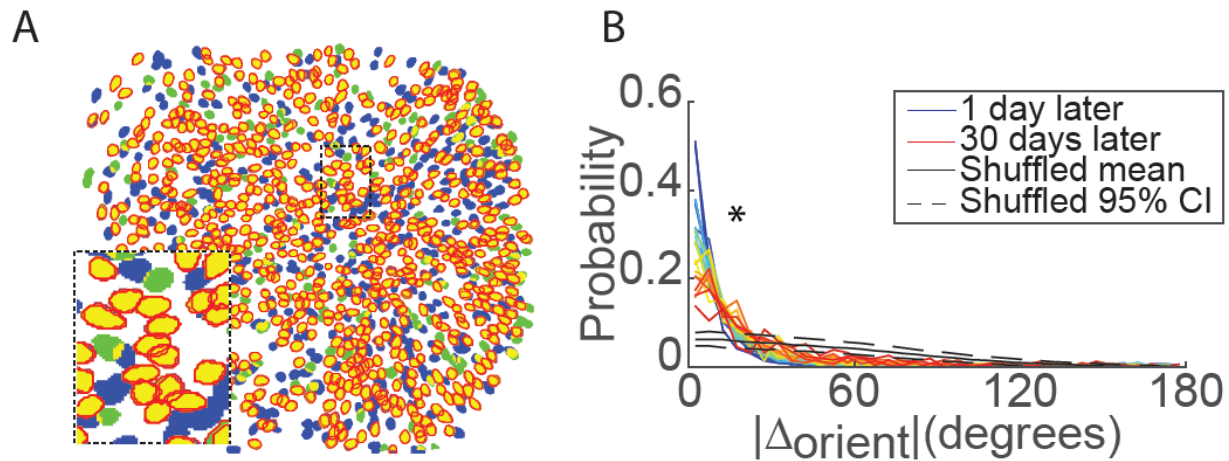

740

741 **Figure S1: Neuron Extraction and Across-Session Registration. Related to Figure 1.**

742 A) Example neuron registration between two sessions. Blue/Green = pixels corresponding to  
743 putative ROIs extracted in the 1<sup>st</sup>/2<sup>nd</sup> session only. Yellow = pixels corresponding to portions of  
744 ROIs active in both sessions. Red = outline of ROIs matched as the same neuron between  
745 sessions.

746 B) The small size of changes in ROI orientation between sessions indicate proper neuron registration  
747 between sessions.

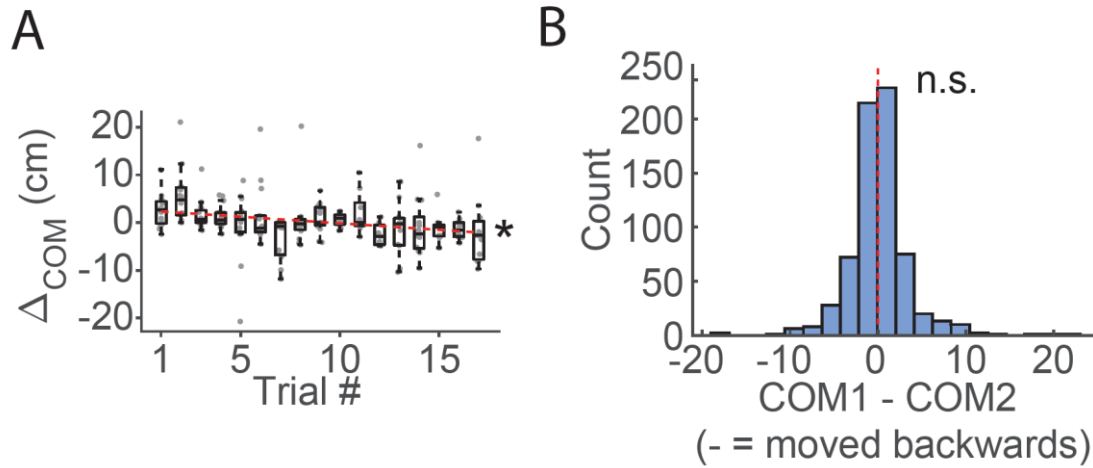

748

749 **Figure S2: Backward Migration of Spatial Firing Across but not Between Sessions. Relate to Figure**

750 **2.**

- 751 A) The centroid of spatial firing on the stem relative to its mean location across the entire session  
752 drifts backwards throughout the session. Circles = centroid shifts for each neuron active on the  
753 stem. Example session from one mouse for right turns only. \* $r = -0.28$ ,  $p = 5.1e-5$ ,  $t = -4.1$  for null  
754 hypothesis that slope = 0.
- 755 B) Average change in centroid location between adjacent sessions for all mice between two sessions  
756 indicates that place field location does not drift between sessions.  $p = 0.67$  t-test.

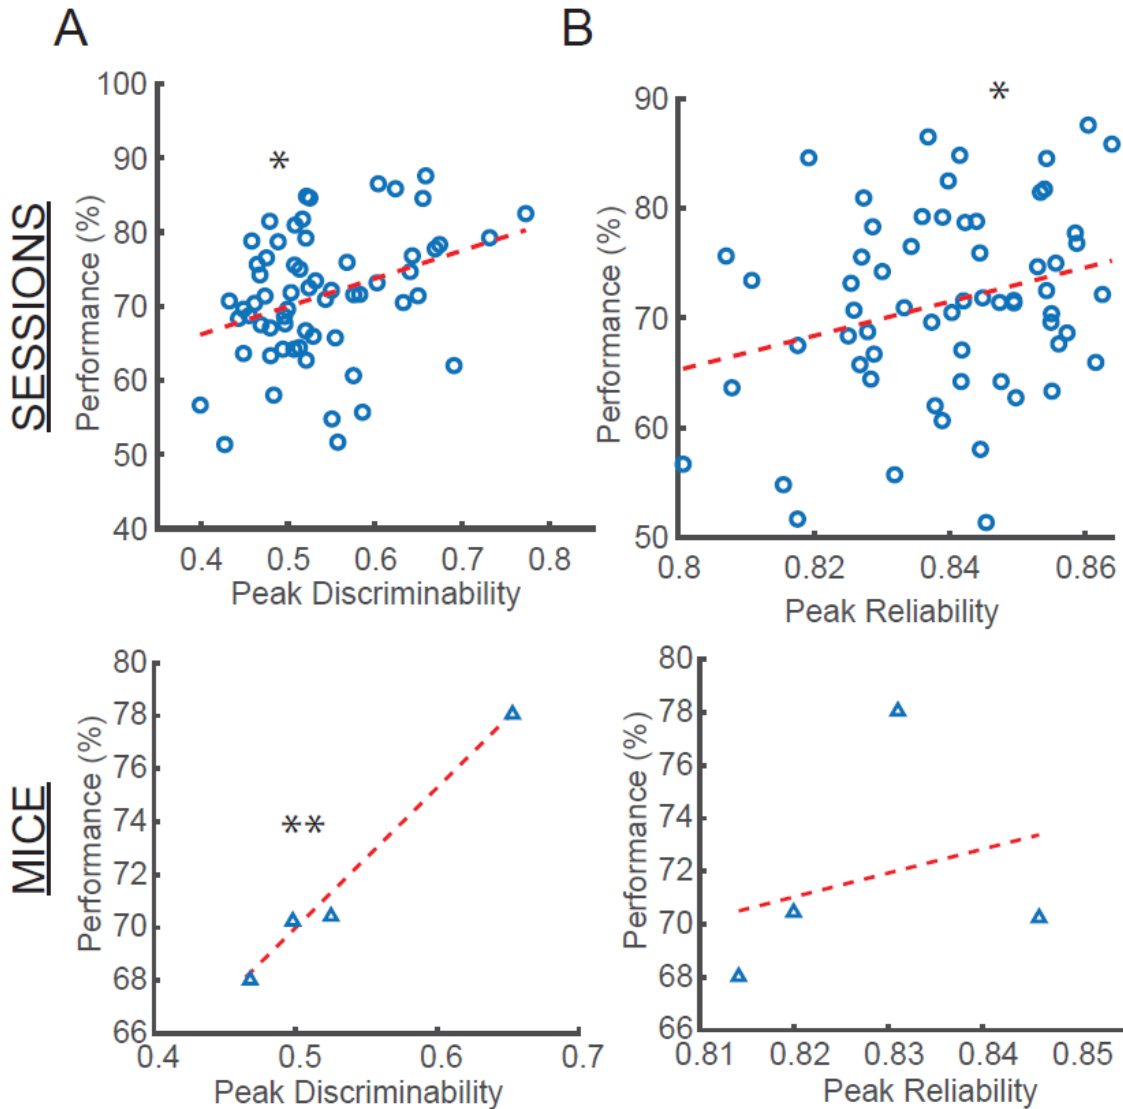

757

758 **Figure S3: The Quality of Local Trajectory-Dependent Information Correlates with Performance.**

759 **Related to Figure 3.**

760 A) *Top*: Performance for each session versus the peak discriminability value for all cells from that  
 761 session. Circles = all sessions, all mice. *Bottom*: Same as *Top* but for each mouse, triangles =  
 762 average for each mouse. \* $\rho=0.35$ ,  $p=0.0056$ , \*\*  $\rho=0.99$ ,  $p=0.0066$  Pearson correlation.

763 B) Same as A, but for the peak reliability value. \* $\rho=-0.27$ ,  $p=0.031$  Pearson correlation.

764

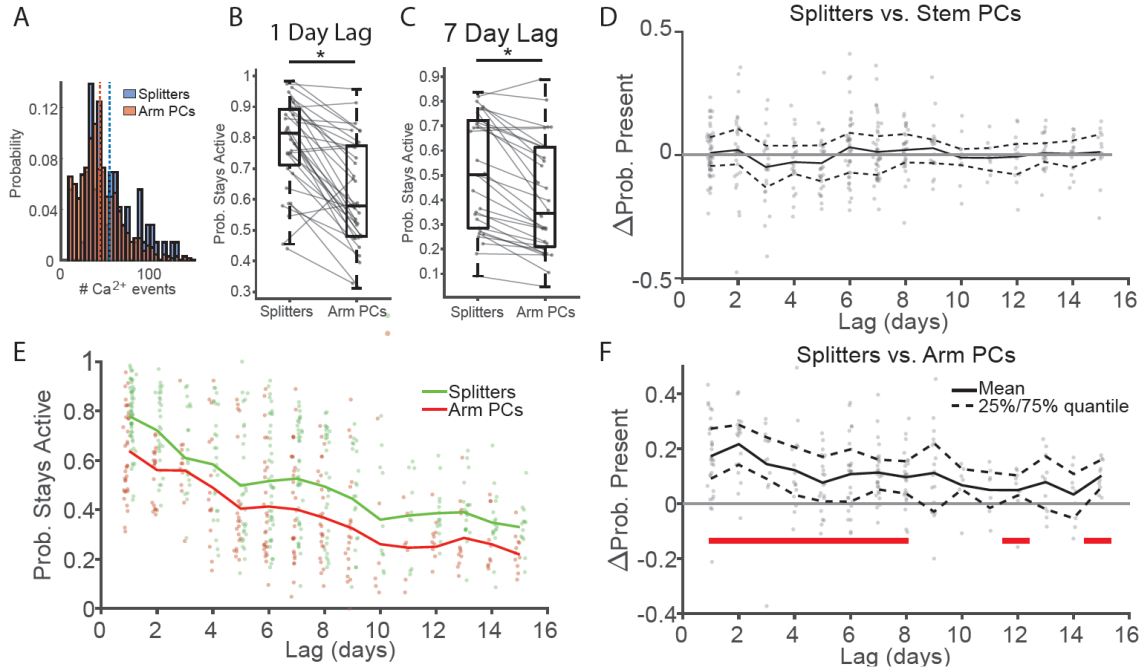

765

766 **Figure S4: Decreased Turnover Rates for Non Event-Rate Matched Splitters versus Place Cells.**

767 **Related to Figure 4.**

- 768 A) Histogram from one session showing that  $\text{Ca}^{2+}$  event rates are higher for splitters for than for arm  
 769 PCs. Blue/red dashed: mean number  $\text{Ca}^{2+}$  events for splitter/arm PCs.  
 770 B) Probability splitters and PCs stay active one day later for all mice.  $*p=3.2 \times 10^{-6}$ , one-sided signed-  
 771 rank test.  
 772 C) Probability splitters and PCs stay active seven days later for all mice.  $*p=3.7 \times 10^{-6}$ , one-sided  
 773 signed-rank test.  
 774 D) Difference between the probability that splitters stay active versus the probability stem PC stay  
 775 active. Dots: probability differences for individual session-pairs. Black solid/dashed lines: Mean  
 776 and 25%/75% quantiles of data at each time point. See Table 3: One-sided Signed-Rank  
 777 Significance Values for Probability Splitter vs. Return Arm Place Cells (APCs) are Present,  
 778 Event-Rate Matched. for one-sided signed-rank test p-values at all lags.  
 779 E) Probability splitters and arm place cells stay active versus lag between sessions. Dots:  
 780 probabilities from individual session-pairs, lines: mean probability at each time lag. Green/red:  
 781 splitters/arm PCs.  
 782 F) Same as D for splitters vs. arm PCs. Red bars = significant differences after Holm-Bonferroni  
 783 correction of one-sided sign test,  $\alpha = 0.05$ .

784

785

786

787 **Table 3: One-sided Signed-Rank Significance Values for Probability Splitter vs. Return Arm Place**  
 788 **Cells (APCs) are Present, Event-Rate Matched.**

|                    |           |          |           |           |           |           |           |
|--------------------|-----------|----------|-----------|-----------|-----------|-----------|-----------|
| <b>Lag (days)</b>  | <b>1</b>  | <b>2</b> | <b>3</b>  | <b>4</b>  | <b>5</b>  | <b>6</b>  | <b>7</b>  |
| <b>vs. Arm PCs</b> | 7.0e-7    | 7.3e-5   | 0.003     | 0.018     | 0.013     | 0.005     | 1.4e-5    |
| <b>Lag (days)</b>  | <b>8</b>  | <b>9</b> | <b>10</b> | <b>11</b> | <b>12</b> | <b>13</b> | <b>14</b> |
| <b>vs. Arm PCs</b> | 7.8e-5    | 0.05     | 0.11      | 0.22      | 0.01      | 0.13      | 0.17      |
| <b>Lag (days)</b>  | <b>15</b> |          |           |           |           |           |           |
| <b>vs. Arm PCs</b> | 9.8e-4    |          |           |           |           |           |           |

789

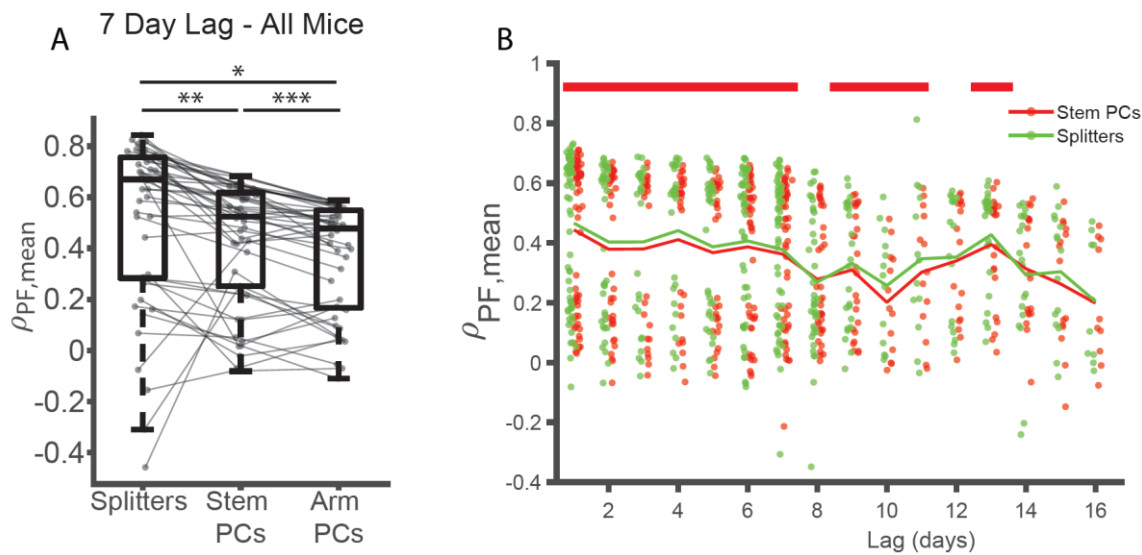

790

791 **Figure S5: Spatial Consistency of Splitters vs. Stem Place Cells (PCs). Related to Figure 5.**

- 792 A) Mean spatial correlations for splitter neurons versus stem PCs and return arm PCs for all sessions  
 793 seven days apart from all mice. \* $p=8.6 \times 10^{-6}$ , \*\* $p=4.5 \times 10^{-6}$ , \*\*\* $p=6.5 \times 10^{-5}$  one-sided signed-rank  
 794 test.  
 795 B) Mean spatial correlations for splitter neurons and stem PCs versus lag between sessions for all  
 796 mice/sessions. Red = Arm PCs, green = splitters, red bars = significant differences after Holm-  
 797 Bonferroni correction of one-sided sign-test,  $\alpha = 0.05$ . See Table 2 for p-values at all lags.



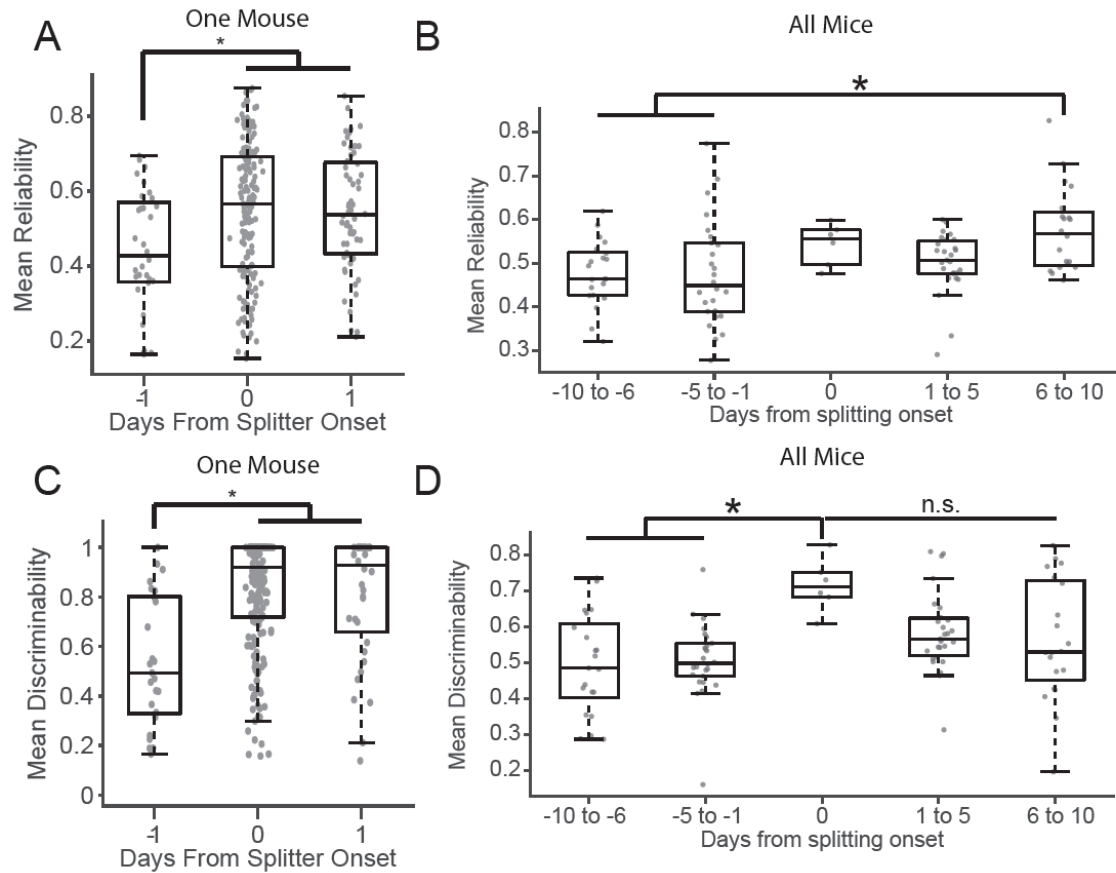

798

799 **Figure S6: Tracking the Onset of Trajectory-Dependent Activity along the Entire Stem. Related to**

800 **Figure 6.**

- 801 A) Mean reliability along the stem +/- 1 days from splitter onset for one representative mouse.  $p =$   
 802 0.008 Kruskal-Wallis ANOVA, \* $p < 0.03$  post-hoc Tukey test. Circles = mean reliability score  
 803 for each neuron.
- 804 B) Mean reliability +/- 10 days from splitter onset for all mice.  $p = 0.0024$  Kruskal-Wallis ANOVA,  
 805 \* $p < 0.02$  post-hoc Tukey test. Circles = mean of mean reliability of all neurons active on the  
 806 stem for each session.
- 807 C) Mean discriminability along the stem +/- 1 days from splitter onset for one representative mouse.  
 808  $p = 1.7 \times 10^{-6}$  Kruskal-Wallis ANOVA, \* $p < 0.0004$  post-hoc Tukey test. Circles = mean  
 809 discriminability score for each neuron.
- 810 D) Mean discriminability +/- 10 days from splitter onset for all mice.  $p = 0.0014$  Kruskal-Wallis  
 811 ANOVA, \* $p < 0.006$  post-hoc Tukey test. Circles = mean of mean discriminability of all neurons  
 812 active on the stem for each session.

813

814

## METHODS

### 815 *Animals*

816 Five male C57/BL6 mice (Jackson Laboratories), age 3-14 months and weighing 25-30g  
817 were used. One mouse was excluded from analysis after performing the experiment due to the  
818 inability to correct motion artifacts in his imaging videos. Mice were housed socially with 1-3  
819 other mice in a vivarium on a 12hr light/dark cycle with lights on at 7am and given free access to  
820 food and water. All mice were singly housed after surgery. All procedures were performed in  
821 compliance with the guidelines of the Boston University Animal Care and Use Committee.

### 822 *Viral Constructs*

823 We used an AAV9.*Syn*.GCaMP6f.WPRE.SV40 virus from the University of  
824 Pennsylvania Vector Core at an initial titer of  $\sim 4 \times 10^{13}$  GC/mL and diluted it to  $\sim 5\text{-}6 \times 10^{12}$   
825 GC/mL with sterilized 0.05 phosphate buffered saline (KPBS) prior to infusion into CA1.

### 826 *Stereotactic Surgeries*

827 All surgeries were performed in accordance with previously published procedures  
828 (Kinsky et al., 2018; Resendez et al., 2016) in accordance with the Boston University Animal  
829 Care and Use Committee. Briefly, we performed two stereotactic surgeries and one base-plate  
830 implant on naïve mice, aged 3-8 months. Surgeries were performed under 1-2% isoflurane mixed  
831 with oxygen. Mice were given 0.05mL/kg buprenorphine (Buprenex) for analgesia, 5.0mL/kg of  
832 the anti-inflammatory drug Rimadyl (Pfizer), and 400mL/kg of the antibiotic Cefazolin (Pfizer)  
833 immediately after induction. They received the same dosage of Buprenex, Cefazolin, and  
834 Rimadyl twice daily for three days following surgery and were carefully monitored to ensure  
835 they never dropped below 80% of their pre-operative weight during convalescence. In the first

836 surgery, a small craniotomy was performed at AP -2.0, ML +1.5 (right) and 250nL of GCaMP6f  
837 virus was injected 1.5mm below the brain surface at 40nL/min. The needle remained in place a  
838 minimum of 10 minutes after the infusion finished at which point it was slowly removed, the  
839 mouse's scalp was sutured, and the mouse was removed from anesthesia and allowed to recover.

840 3-4 weeks after viral infusion, mice received a second surgery to attach a gradient index  
841 (GRIN) lens (GRINtech, 1mm x 4mm). After performing an ~2mm craniotomy around the  
842 implant area, we carefully aspirated cortex using a blunted 25ga and 27ga needle under constant  
843 irrigation with cold, sterile saline until we visually identified the medial-lateral striations of the  
844 corpus callosum. We carefully removed these striations using a blunted 31ga needle while  
845 leaving the underlying anterior-posterior striations intact, after which we applied gelfoam to stop  
846 any bleeding. We then lowered the GRIN lens until it touched the brain surface and then  
847 proceeded to lower it another 50 $\mu$ m to counteract brain swelling during surgery (note that in two  
848 mice we first implanted a sleeve cannula with a round glass window on the bottom without  
849 depressing an additional 50 $\mu$ m and then cemented in the GRIN lens during base plate  
850 attachment). We then applied Kwik-Sil (World Precision Instruments) to provide a seal between  
851 skull and GRIN lens and then cemented the GRIN lens in place with Metabond (Parkell),  
852 covered it in a layer of Kwik-Cast (World Precision Instruments), and then removed the animal  
853 from anesthesia and allowed him to recover after removing any sharp edges remaining from  
854 dried Metabond and providing any necessary sutures.

855 Finally, after ~2 weeks we performed a procedure in which the mouse was put under  
856 anesthesia but no tissue was cut in order to attach a base plate for easy future attachment of the  
857 microscope. To do so, we attached the base plate to the camera via a set screw, carefully lowered  
858 the camera objective and aligned it to the GRIN lens by eye, and visualized fluorescence via

859 nVistaHD v2.0/v3.0 until we observed clear vasculature and putative cell bodies expressing  
860 GCaMP6f (Resendez et al., 2016), then raised the camera up ~50 $\mu$ m before applying Flow-It  
861 ALC Flowable Composite (Pentron) between the underside of the baseplate and the cured  
862 Metabond on the mouse's skull. After light curing we applied opaque Metabond over the Flow-It  
863 ALC epoxy to the sides of the baseplate to provide additional strength and to block ambient light  
864 infiltration.

### 865 *Imagine Acquisition and Processing*

866 Brain imaging data was obtained using nVista HD (Inscopix) v2/v3 at 1440 x 1280 pixels  
867 and a 20 Hz sample rate. Two mice were lightly anesthetized (~60 seconds) to facilitate camera  
868 attachment and then given ~15 minutes to recover prior to any recordings; the camera was  
869 attached to the other two mice while they were awake. Prior to neuron/calcium event  
870 identification we first pre-processed each movie using Mosaic (Inscopix) software which  
871 entailed a) spatially downsampling by a factor of 2 (1.18  $\mu$ m/pixel), b) performing motion  
872 corrections, and c) cropping the motion-corrected movie to eliminate any dead pixels or areas  
873 with no calcium activity. We then extracted a minimum projection of the pre-processed movie  
874 for later neuron registration. We replaced isolated dropped frames (maximum 2 consecutive  
875 frames) with the previous good frame, and in the rare case where more than 2 frames dropped in  
876 a row these frames were excluded from all analyses.

### 877 *Neuron and Calcium Event Identification*

878 We utilized custom-written, open-source MATLAB software (available at  
879 <https://github.com/SharpWave/Tenaspis>) to identify putative neuron ROIs and their calcium  
880 events in accordance with previously published results (Kinsky et al., 2018; Mau et al., 2018). A

881 neuron had to have at least four calcium events in order to be considered active on a given  
882 session.

### 883 *Across-Session Neuron Registration*

884 We utilized custom-written, open-source MATLAB software (available at  
885 <https://github.com/nkinsky/ImageCamp>) to perform neuron registration across sessions in  
886 accordance with previously published results (see Figure S1). We checked the quality of neuron  
887 registration between each session-pair in two ways: 1) by plotting the distribution of changes in  
888 ROI orientations between session and comparing it to chance, calculated by shuffling neuron  
889 identity between session 1000 times, and 2) plotting ROIs of all neurons between two sessions  
890 and looking for systematic shifts in neuron ROIs that could lead to false negatives/positives in the  
891 registration. During the course of these checks, we noticed the quality of registration between  
892 sessions dropped significantly approximately halfway through the experiment for two mice.  
893 Thus, we excluded any registrations occurring between the first and second halves of the  
894 experiment for these two mice. Furthermore, the second half of the experiment was excluded for  
895 these two mice when calculating the absolute onset session of place cells and splitter cells but  
896 was included when calculating the relative onset day for each cell type. Several other session-  
897 pairs exhibiting poor registrations based on the criteria above were also excluded, though these  
898 were rare.

### 899 *Behavioral Tracking and Parsing*

900 Behavioral data was recorded via an overhead camera with Cineplex v2/v3 software  
901 (Plexon) at a 30Hz sample rate. Cineplex produced automated tracking of the animal's position  
902 by comparing each frame to a baseline image without the animal in the arena. Imaging and

903 behavioral data were synchronized by TTL pulse at the beginning of the recording. Each video  
904 was inspected by eye for errors in automated tracking and fixed manually via custom-written  
905 MATLAB software. After fixing all erroneous data points, the animal's position was interpolated  
906 to determine his location at each imaging movie time point.

## 907 *Histology*

908 Mice were killed and transcardially perfused with 10% KPBS followed by formalin.  
909 Brains of perfused mice were then extracted and post-fixed in formalin for 2-4 more days after  
910 which they were placed in a 30% sucrose solution in KPBS for 1-2 additional days. The brains  
911 were then frozen and sliced on a cryostat (Leica CM 3050S) in 40  $\mu$ m sections after which they  
912 were mounted and coverslipped with Vectashield Hardset mounting medium with DAPI (Vector  
913 Laboratories). We then imaged slides at 4x, 10x, and 20x on a Nikon Eclipse Ni-E  
914 epifluorescence microscope to verify proper placement of the GRIN lens above the CA1  
915 pyramidal cell layer.

## 916 *Experimental Outline*

917 After recovery from surgery, mice were food deprived to maintain no less than 85% of  
918 their pre-surgery weight. Mice were subsequently exposed to a variety of arenas in order to  
919 habituate them to navigating with the camera attached. Prior to training on the alternation task,  
920 all mice were given 1-4 habituation sessions on the alternation maze. The maze floor (inner  
921 dimension = 64 x 29 cm) and walls (height = 18cm) were constructed from 3/8 inch (0.95cm)  
922 thick plywood and the barriers between arms were constructed from two 53cm long 1.5 x 5.5  
923 inch (3.8 x 14 cm) pine framing studs. The finished maze consisted of a central stem and two  
924 return arms, each 7.5cm wide with 5.7cm wide openings at each of the central stem through

925 which mice could exit or enter the return arms. Two food wells ~ 0.25 cm deep were created  
926 toward the end of each return arm to hold chocolate sprinkles: they were centered 12.5 cm from  
927 the end of the maze where mice exited the return arm/entered the center stem. Food was placed  
928 in these wells through a small opening in the side of the maze. The arena was sealed with  
929 urethane prior to exploration.

930 Three of the mice were first trained to loop on each side of the maze independently in 3-  
931 10 minutes blocks by blocking off access to the other side with Plexiglas dividers in order to  
932 familiarize mice with the general task demands, arena, and location of food reward (chocolate  
933 sprinkles); the other mouse received one habituation session where he was allowed to freely  
934 traverse the maze. Following habituation, mice were placed in the center stem and rewarded at  
935 the well on the reward arm regardless of the first turn direction. On subsequent trials, mice were  
936 only rewarded if they turned the opposite direction of the previous trial. Mice were allowed to  
937 run freely and were only blocked when they a) attempted to reverse course on the central stem,  
938 b) attempted to exit the return arm after they had committed to it, or c) attempted to run straight  
939 across to the other arm without turning down the central stem after obtaining reward. A mouse  
940 was considered committed to an arm after his tail entirely crossed from the edge of the central  
941 arm into the stem. Mice generally ran ballistically down the center stem and were allowed to  
942 pause once they entered the return arm and after they obtained reward. Food reward was only  
943 delivered once the mouse had committed to a return arm in order to avoid providing an auditory  
944 cue of reward location. Two mice were forced to alternate in a subset of sessions/trials. One  
945 mouse encountered a lapse in performance mid-way through the experiment and began  
946 perseverating on one turn direction in blocks: he was subsequently given a number of trials at the  
947 beginning of each session where he was forced to turn each direction by blocking off one turn

948 direction with a Plexiglas divider, after which he was then allowed to freely choose turn  
949 directions. The other mouse was initially forced to alternate at the end of his habituation looping  
950 sessions. All forced trials were not considered during later data analysis. Mice received 1-2  
951 sessions per day. Sessions were terminated each day after 30 minutes or when the mouse stopped  
952 consistently running ballistically down the center arm, whichever came first. The experiment  
953 lasted 27, 16, 29, and 36 days for the four mice involved.

#### 954 *Place Cell Identification*

955 Place cell identification was performed as described in Kinsky et al.(2018).

#### 956 *Trajectory-Dependent/Splitter Cell Identification*

957 Prior to performing any analysis, each mouse's trajectory data was aligned to that from  
958 the first habituation session. This was done by 1) manually rotating the data to correct for any  
959 day-to-day changes in maze angle relative to the recording camera, 2) calculating the edges of  
960 the mouse's trajectory as the data points located at the 2.5% and 97.5% points in the cumulative  
961 density function of his x/y position data, and 3) adjusting the data by applying the necessary  
962 translation and scaling (minimal) to overlay each session's trajectory on the first session. After  
963 aligning data across sessions, the mouse's trajectory on each trajectory was parsed into his  
964 progression through the different sections of the maze, starting at the a) **base**, then moving down  
965 the b) **center stem** into the c) **choice** point, then turning into the d) left/right **entry** to the e)  
966 **return arm**, and finally entered the f) **approach** to the center stem just after the reward port.  
967 The center stem portion was manually identified for each mouse as the point where the mouse's  
968 trajectory into/out of each return arm stopped diverging. This was done in order to mitigate the



969 possibility that trajectory-dependent activity was controlled entirely by stereotyped sensory  
970 inputs, e.g. the mouse hugging/whisking the left side of the center stem after right turn trial.

971         After parsing the animal's behavior into these sections, the center stem was broken up  
972 into ~1cm bins and the event rate for each neuron was calculated for each trial. Tuning curves for  
973 each trial type (left or right turn) were then constructed, which consisted of each neuron's mean  
974 event rate for all correct trials at each spatial bin. The difference between these curves was then  
975 calculated. To assess significance, we again constructed tuning curves for left/right trials and  
976 calculated their difference, but after randomly shuffling trial turn identity 1000 times to establish  
977 the likelihood the observed difference between tuning curves could emerge by chance. We then  
978 defined splitters/trajectory-dependent cells as neurons which had at least three bins whose real  
979 tuning curve difference exceeded 950 of shuffled values. In order to exclude spurious  
980 identification of splitters we only included neurons that produced a calcium event on the stem of  
981 the maze on at least 5 trials.

982         We calculated several different metrics to quantify the level of trajectory-dependent  
983 activity in each neuron. First, we calculated discriminability by summing the absolute value of  
984 the difference between tuning curves along all stem bins and then dividing by the sum of tuning  
985 curves along all stem bins. Second, we calculated reliability in the following manner: a) we  
986 shuffled trial identity 1000 times and calculated the difference between shuffled tuning curves,  
987 then b) calculated the proportion of shuffles in which the real difference between tuning curves  
988 exceeded that of shuffled, then c) calculated reliability as the mean of this proportion along all  
989 the stem bins. Note that splitter neurons by definition must have at least three bins with a  
990 reliability value above 0.95 (see above). Last, we calculated the correlation between left and  
991 right tuning curves. Note that this metric is very conservative since it produces low correlations

992 for splitters who shift the location of their peak activity between left and right trials along the  
993 length of the stem (Figure 2B) but not for splitters who modulate their event rate in the same  
994 place along the stem (Figure 2A).

995 In order to check the robustness of our results and control for any trajectory-dependent  
996 information resulting from stereotyped deviations in speed or lateral position along the stem, we  
997 also performed an additional analysis in line with previous studies (Ito et al., 2015; Wood et al.,  
998 2000). To do so, we first divided the stem into five bins and calculated the average transient  
999 probability in each bin for all trials. We then performed an ANOVA analysis using the anovan  
1000 function in MATLAB for each trajectory-dependent splitter neuron we detected. We used trial  
1001 type (left/right), stem bin, stem bin x trial type, speed, and the animal's lateral position as  
1002 covariates and mean transient probability as our dependent variable. Finally, we considered any  
1003 neuron to be a trajectory-dependent splitter neuron if had had a significant effect of trial type or  
1004 trial type x stem bin after accounting for speed and lateral position.

### 1005 ***Linear Discriminant Decoding Analysis***

1006 A linear discriminant decoder was trained on data from 50% of trials on a given session  
1007 using the fitdiscr function in MATLAB. Calcium event activity for each neuron at each time  
1008 point when the mouse was on the center stem were used as the input variables and the mouse's  
1009 upcoming turn direction was used as the response variable. Only correct trials were considered  
1010 for training. The decoder was then used to predict the turn direction of the other 50% of trials,  
1011 after which the process was repeated 999 times using a different random 50% of trials for  
1012 training/decoding. The decoding accuracy was then calculated in ~3.3cm bins along the stem,  
1013 and the mean accuracy across all bins was taken as the decoding accuracy for that session.

1014 ***Functional Phenotype Designation and Analysis of Neurons that Remain Active between***  
1015 ***Sessions***

1016 We first performed neuron registration between sessions and classified neurons as staying  
1017 active if they were identified by our cell extraction algorithm on both sessions and produced at  
1018 least five calcium events (while the mouse was running) through the course of the first recording  
1019 session being considered in the registration. We then categorized cells into three different  
1020 functional phenotypes, 1) context-dependent splitter cells, 2) arm place cells, and 3) stem place  
1021 cells. Splitter cells were designated based on the criteria listed above. Neurons that produced no  
1022 calcium activity on the stem of the maze and met our place cell criteria were defined as return  
1023 arm place cells. Neurons that produced calcium activity on the stem and met our place cell  
1024 criteria but not our splitter neuron criteria were designated as stem place cells. In order to ensure  
1025 sufficient precision in calculating the probability a functional phenotype stayed active, a session-  
1026 pair was excluded from analysis if there were fewer than ten cells in either category in the first  
1027 session being registered. This analysis was performed in two ways: 1) including all cells found  
1028 for each phenotype, and 2) matching mean event rate between neuron phenotype by excluding  
1029 the lowest firing rate place cells. In the rare event that place cells had a higher mean firing rate  
1030 than splitter cells, no place cells were excluded.

1031 ***Phenotype Ontogeny Analysis***

1032 We tracked the ontogeny splitter cells in three steps. First, we registered all the neurons we  
1033 recorded across the entire experiment. Second, we identified the first day/session that a neuron  
1034 passed our statistical criteria to be considered a splitter and defined that session as its onset.  
1035 Finally, we calculated multiple metrics for the quantity of trajectory-dependent activity produced

1036 by each of these neurons (see 0 above) in all the sessions preceding and following onset,  
1037 excluding any sessions that occurred on the same day. The methodology for tracking place cell  
1038 onset was identical, except mutual information was used as a metric of spatial information  
1039 provided by each cell.

1040

#### 1041 **AUTHOR CONTRIBUTIONS**

1042 Conceptualization: NRK. Methodology: NRK. Software: NRK, WM, DJS, SJL. Validation:  
1043 NRK. Formal Analysis: NRK, WM. Investigation: NRK, WM. Resources: NRK, MEH. Data  
1044 Curation: NRK, WM, EAR. Writing – original draft preparation: NRK. Writing – review and  
1045 editing: NRK, WM, DJS, EAR, SJL, MEH. Visualization: NRK, WM. Supervision: MEH, NRK.  
1046 Project administration: NRK, MEH. Funding Acquisition: MEH.

1047

#### 1048 **ACKNOWLEDGEMENTS**

1049 First and foremost we would like to thank Dr. Howard Eichenbaum for his help in all stages of  
1050 this project. We would like to also thank Dr. Jon Rueckemann and Dr. Nick Robinson for input  
1051 on data analysis, interpretation, and feedback during manuscript preparation. We would like to  
1052 thank Dr. Steve Gomperts, Dr. Annabelle Singer, Dr. Amar Sahay, Dr. Kamran Diba and the  
1053 members of their labs for helpful comments during discussions of this work. We would also like  
1054 to thank Dr. Ian Davison, Dr. Steve Ramirez, Dr. Ehren Newman, and Dr. Mark Kramer, as well  
1055 as Dr. Andrew Alexander, Dr. Jake Hinman, Dr. John Bladon, Dr. Ryan Place, Dan Sheehan,  
1056 Winny Ning, Dan Orlin, Jiawen Chen, and Catherine Mikkelsen for feedback and critiques  
1057 during early stages of data analysis and writing. We would like to thank Annalyse Kohley,  
1058 Hanish Polavarapu, and Scott Bovino for help with animal training and behavioral tracking

1059 quality control. We would like to thank Denise Parisi, Dr. Shelley Russek, and Sandra Grasso for  
1060 administrative support. We would like to acknowledge the GENIE Program, specifically Vivek  
1061 Jayaraman, Ph.D., Douglas S. Kim, Ph.D., Loren L. Looger, Ph.D., Karel Svoboda, Ph.D. from  
1062 the GENIE Project, Janelia Research Campus, Howard Hughes Medical Institute, for providing  
1063 the GCaMP6f virus. Finally, we would like to acknowledge Inscopix, Inc. for making single-  
1064 photon calcium imaging miniscopes widely available, and specifically Lara Cardy and Vardhan  
1065 Dani for all their technical support throughout and after the experiment.

1066

1067 **GRANT SUPPORT**

1068 This work was supported by ONR MURI N00014-16-1-2832, NIH R01 MH060013,  
1069 NIH RO1 MH052090, NIH RO1 MH051570, and NSF NRT UtB: Neurophotonics DGE-  
1070 1633516.

1071

1072 The authors declare no competing interests.
